# Supplementary material for: Identification of miRNAs during mouse postnatal ovarian development and superovulation
Source: J Ovarian Res. 2015 Jul 8;8:44. doi: 10.1186/s13048-015-0170-2 (PMC4499447; doi:10.1186/s13048-015-0170-2)
Supplement: Additional file 1: Table S1. — Survey of miRDeep2 performance for score cut-offs 0 to 10. [file 13048_2015_170_MOESM1_ESM.doc]

**Supplementary Table 1 Survey of miRDeep2 performance for score cut-offs 0 to 10.**

|  | **Novel miRNAs** | | | **Known miRBase miRNAs** | | |  |
| --- | --- | --- | --- | --- | --- | --- | --- |
| [miRDeep2 score](http://www.nature.com/nbt/journal/v26/n4/abs/nbt1394.html)1 | [Predicted by mirdeep2](../../../../E:%5CPhD%20stuff%5CDeep%20sequencing%5CmiRNA%20Data%5CData%2001%5C5_novel_miRNA_prediction%5CTable%204.1预测识别新miRNA分析结果.html)2 | [Estimated false positives](../../../../E:%5CPhD%20stuff%5CDeep%20sequencing%5CmiRNA%20Data%5CData%2001%5C5_novel_miRNA_prediction%5CTable%204.1预测识别新miRNA分析结果.html)3 | [Estimated true positives](../../../../E:%5CPhD%20stuff%5CDeep%20sequencing%5CmiRNA%20Data%5CData%2001%5C5_novel_miRNA_prediction%5CTable%204.1预测识别新miRNA分析结果.html)4 | [in species](../../../../E:%5CPhD%20stuff%5CDeep%20sequencing%5CmiRNA%20Data%5CData%2001%5C5_novel_miRNA_prediction%5CTable%204.1预测识别新miRNA分析结果.html)5 | [in data](../../../../E:%5CPhD%20stuff%5CDeep%20sequencing%5CmiRNA%20Data%5CData%2001%5C5_novel_miRNA_prediction%5CTable%204.1预测识别新miRNA分析结果.html)6 | [Detected by mirdeep2](../../../../E:%5CPhD%20stuff%5CDeep%20sequencing%5CmiRNA%20Data%5CData%2001%5C5_novel_miRNA_prediction%5CTable%204.1预测识别新miRNA分析结果.html)7 | [Estimated signal-to-noise](../../../../E:%5CPhD%20stuff%5CDeep%20sequencing%5CmiRNA%20Data%5CData%2001%5C5_novel_miRNA_prediction%5CTable%204.1预测识别新miRNA分析结果.html)8 |
| 10 | 86 | 20 ± 5 | 66 ± 5 (76 ± 5%) | 1157 | 937 | 532 (57%) | 13.8 |
| 9 | 93 | 21 ± 5 | 72 ± 5 (77 ± 5%) | 1157 | 937 | 534 (57%) | 13.6 |
| 8 | 98 | 22 ± 5 | 76 ± 5 (77 ± 5%) | 1157 | 937 | 536 (57%) | 13.4 |
| 7 | 107 | 23 ± 5 | 84 ± 5 (78 ± 5%) | 1157 | 937 | 539 (58%) | 13.2 |
| 6 | 113 | 25 ± 6 | 88 ± 6 (78 ± 5%) | 1157 | 937 | 543 (58%) | 12.6 |
| **5** | **160** | **31 ± 7** | **129 ± 7 (81 ± 4%)** | **1157** | **937** | **655 (70%)** | **12.1** |
| 4 | 196 | 55 ± 8 | 141 ± 8 (72 ± 4%) | 1157 | 937 | 686 (73%) | 7.7 |
| 3 | 229 | 170 ± 15 | 59 ± 15 (26 ± 6%) | 1157 | 937 | 697 (74%) | 3 |
| 2 | 267 | 247 ± 17 | 21 ± 15 (8 ± 6%) | 1157 | 937 | 711 (76%) | 2.3 |
| 1 | 410 | 326 ± 19 | 84 ± 19 (20 ± 5%) | 1157 | 937 | 752 (80%) | 2.2 |
| 0 | 535 | 500 ± 24 | 36 ± 23 (7 ± 4%) | 1157 | 937 | 759 (81%) | 1.7 |

1 miRDeep2 score signify the log-odds probability of a sequence being true miRNA precursor compared to probability that it is a background hairpin.

2Number of novel miRNA hairpins with a score ≥ cut-off value.

3Number of false positive miRNA hairpins predicted at this cut-off, as estimated by the miRDeep2 controls. Mean and standard deviation are estimated from 100 rounds of permuted controls.

4Number of true positive miRNA hairpins is estimated as t = total novel miRNAs - false positive novel miRNAs. The percentage of the predicted novel miRNAs that is estimated to be true positives is calculated as p = t/total novel miRNAs. The number of false positives is estimated from 100 rounds of permuted controls. In each of the 100 rounds, t and p are calculated, generating mean and standard deviation of t and p. The variable p can be used as an estimation of miRDeep2 positive predictive value at the score cut-off.

5Reference mature miRNAs for human given as input to miRDeep2.

6Number of reference mature miRNAs perfectly mapped to one or more of precursor candidates that have been excised from the genome by miRDeep2.

7Number of reference mature miRNAs perfectly mapped to one or more of predicted miRNA hairpins that have a score equal to or above the cut-off value. The percentage of reference mature miRNAs in data that is detected by miRDeep2 (s = reference mature miRNAs detected/reference mature miRNAs in data. s can be used as an estimation of miRDeep2 sensitivity at the score cut-off).

8The signal-to-noise ratio for the given score cut-off was computed as r = total miRNA hairpins reported / mean estimated false positive miRNA hairpins over 100 rounds of permuted controls.
