# Supplementary material for: Identification of miRNAs during mouse postnatal ovarian development and superovulation
Source: J Ovarian Res. 2015 Jul 8;8:44. doi: 10.1186/s13048-015-0170-2 (PMC4499447; doi:10.1186/s13048-015-0170-2)
Supplement: Additional file 3: Table S3. — List of putative target genes. [file 13048_2015_170_MOESM3_ESM.xlsx]

## Sheet: Sheet1
miRNA	Target gene	DIANAmT	miRanda	miRDB	miRWalk	RNAhybrid	PICTAR5	Targetscan	SUM
mmu-miR-141	Dr1	1	1	1	1	1	1	1	7
mmu-miR-141	Taf12	1	1	1	1	1	1	1	7
mmu-miR-145	Cited2	1	1	1	1	1	1	1	7
mmu-miR-145	Atxn2	1	1	1	1	1	1	1	7
mmu-miR-150	Pfn	1	1	1	1	1	1	1	7
mmu-miR-15a	Plekhc1	1	1	1	1	1	1	1	7
mmu-miR-15a	Setd3	1	1	1	1	1	1	1	7
mmu-miR-15a	Ppp6c	1	1	1	1	1	1	1	7
mmu-miR-15a	Cops2	1	1	1	1	1	1	1	7
mmu-miR-183	Dusp10	1	1	1	1	1	1	1	7
mmu-miR-183	L3mbtl3	1	1	1	1	1	1	1	7
mmu-miR-183	Btg1	1	1	1	1	1	1	1	7
mmu-miR-20a	E2f5	1	1	1	1	1	1	1	7
mmu-miR-20a	Map3k2	1	1	1	1	1	1	1	7
mmu-miR-20a	Vldlr	1	1	1	1	1	1	1	7
mmu-miR-20a	Rbl2	1	1	1	1	1	1	1	7
mmu-miR-20a	Sar1b	1	1	1	1	1	1	1	7
mmu-miR-21	Peli1	1	1	1	1	1	1	1	7
mmu-miR-21	Trim33	1	1	1	1	1	1	1	7
mmu-miR-29a	Strn3	1	1	1	1	1	1	1	7
mmu-miR-29a	Ireb2	1	1	1	1	1	1	1	7
mmu-miR-29a	Mark3	1	1	1	1	1	1	1	7
mmu-miR-29a	Col9a1	1	1	1	1	1	1	1	7
mmu-miR-29a	Zfp36l1	1	1	1	1	1	1	1	7
mmu-miR-29a	Col11a1	1	1	1	1	1	1	1	7
mmu-miR-30b	D12Ertd553e	1	1	1	1	1	1	1	7
mmu-miR-136	Zic3	1	1	1	1	0	1	1	6
mmu-miR-136	Pcdh18	1	1	1	1	0	1	1	6
mmu-miR-136	Ap3m1	1	1	1	1	0	1	1	6
mmu-miR-136	Nono	1	1	1	1	0	1	1	6
mmu-miR-136	Sema3a	1	1	1	1	0	1	1	6
mmu-miR-136	Inoc1	1	1	0	1	1	1	1	6
mmu-miR-136	Cbx4	1	1	1	1	0	1	1	6
mmu-miR-136	Crispld1	1	1	1	1	0	1	1	6
mmu-miR-136	Arhgap24	1	1	1	1	0	1	1	6
mmu-miR-136	Zfp532	1	1	1	1	0	1	1	6
mmu-miR-136	Mfap3l	1	1	1	1	0	1	1	6
mmu-miR-136	Epc2	1	1	1	1	0	1	1	6
mmu-miR-136	Enpep	1	1	1	1	0	1	1	6
mmu-miR-136	Dock4	1	1	1	1	0	1	1	6
mmu-miR-141	Stat5a	1	1	1	1	0	1	1	6
mmu-miR-141	Lmbr1	1	1	1	1	0	1	1	6
mmu-miR-141	Pten	1	1	1	1	1	0	1	6
mmu-miR-141	Papolg	1	1	1	1	0	1	1	6
mmu-miR-141	Kbtbd4	1	1	1	1	0	1	1	6
mmu-miR-141	Tada1l	1	1	1	1	0	1	1	6
mmu-miR-141	Atxn7	1	1	1	1	0	1	1	6
mmu-miR-141	Atg2b	1	1	1	1	0	1	1	6
mmu-miR-141	Tdo2	1	1	1	1	0	1	1	6
mmu-miR-141	Mbnl1	1	1	1	1	1	0	1	6
mmu-miR-141	Prmt3	1	1	1	1	0	1	1	6
mmu-miR-141	Slc10a2	1	1	1	1	0	1	1	6
mmu-miR-141	2610101N10Rik	1	1	1	1	0	1	1	6
mmu-miR-141	Brd3	1	1	1	1	0	1	1	6
mmu-miR-141	Ddx5	1	1	0	1	1	1	1	6
mmu-miR-141	Slc25a3	1	1	1	1	0	1	1	6
mmu-miR-141	Sema3d	1	1	1	1	0	1	1	6
mmu-miR-141	Prdm4	1	1	1	1	0	1	1	6
mmu-miR-141	Stxbp1	1	1	1	1	0	1	1	6
mmu-miR-141	Ppt2	1	1	1	1	0	1	1	6
mmu-miR-141	Tnrc6b	1	1	1	1	1	0	1	6
mmu-miR-141	Hnrnpf	1	1	1	1	0	1	1	6
mmu-miR-141	Ppp2ca	1	1	0	1	1	1	1	6
mmu-miR-141	Phyhipl	1	1	1	1	0	1	1	6
mmu-miR-141	Dcun1d3	1	1	1	1	1	0	1	6
mmu-miR-141	Ppfibp1	1	1	1	1	0	1	1	6
mmu-miR-141	Pds5b	1	1	1	1	0	1	1	6
mmu-miR-141	Pitx2	1	1	1	1	0	1	1	6
mmu-miR-141	Dlx5	1	1	1	1	0	1	1	6
mmu-miR-141	Nlgn3	1	1	1	1	0	1	1	6
mmu-miR-141	B3gnt1	1	1	1	1	0	1	1	6
mmu-miR-141	H2afz	1	1	1	1	1	0	1	6
mmu-miR-141	Cdc2l5	1	1	1	1	0	1	1	6
mmu-miR-141	Crlf3	1	1	1	1	0	1	1	6
mmu-miR-141	Pkd2	1	1	1	1	0	1	1	6
mmu-miR-141	Bhlhb2	1	1	1	1	1	0	1	6
mmu-miR-141	Rbm7	1	1	1	1	0	1	1	6
mmu-miR-141	Sirt1	1	1	1	1	1	0	1	6
mmu-miR-141	Tbc1d15	1	1	1	1	0	1	1	6
mmu-miR-141	Fem1c	1	1	1	1	0	1	1	6
mmu-miR-141	Pou4f1	1	1	1	1	0	1	1	6
mmu-miR-141	Plp1	1	1	1	1	0	1	1	6
mmu-miR-141	Tcerg1	1	1	1	1	0	1	1	6
mmu-miR-141	Slc30a7	1	1	1	1	0	1	1	6
mmu-miR-141	Pcdh8	1	1	1	1	0	1	1	6
mmu-miR-141	Zeb2	1	1	1	1	0	1	1	6
mmu-miR-141	Gphn	1	1	0	1	1	1	1	6
mmu-miR-141	Atp6v1b2	1	1	1	1	1	0	1	6
mmu-miR-145	Fndc3b	1	1	1	1	1	0	1	6
mmu-miR-145	Angpt2	1	1	1	1	0	1	1	6
mmu-miR-145	Ank1	1	1	1	1	0	1	1	6
mmu-miR-145	Ankrd28	1	1	1	1	1	0	1	6
mmu-miR-145	Abcf3	1	1	1	1	0	1	1	6
mmu-miR-145	Fli1	1	1	1	1	1	0	1	6
mmu-miR-145	Sh3d19	1	1	1	1	0	1	1	6
mmu-miR-145	BC038286	1	1	1	1	0	1	1	6
mmu-miR-145	Add3	1	1	1	1	1	0	1	6
mmu-miR-145	Plcl2	1	1	1	1	0	1	1	6
mmu-miR-145	Nfib	1	1	1	1	0	1	1	6
mmu-miR-145	Slc35f5	1	1	1	1	0	1	1	6
mmu-miR-145	Rbp2	1	1	1	1	0	1	1	6
mmu-miR-145	Ggtl3	1	1	1	1	0	1	1	6
mmu-miR-150	Hspa5	1	1	1	1	0	1	1	6
mmu-miR-150	Sp1	1	1	1	1	0	1	1	6
mmu-miR-150	Foxa2	1	1	1	1	0	1	1	6
mmu-miR-150	Golga7	1	1	1	1	0	1	1	6
mmu-miR-150	Ppp2r1a	1	1	1	1	0	1	1	6
mmu-miR-150	C2cd2l	1	1	1	1	0	1	1	6
mmu-miR-150	Dsg4	1	1	1	1	0	1	1	6
mmu-miR-150	Chmp2b	1	1	1	1	0	1	1	6
mmu-miR-150	Tll1	1	1	1	1	0	1	1	6
mmu-miR-150	Atp6v1h	1	1	1	1	0	1	1	6
mmu-miR-150	G3bp1	1	1	1	1	0	1	1	6
mmu-miR-150	Prkca	1	1	1	1	0	1	1	6
mmu-miR-150	Cpd	1	1	1	1	0	1	1	6
mmu-miR-150	Pdia3	1	1	1	1	0	1	1	6
mmu-miR-150	Gldc	1	1	1	1	0	1	1	6
mmu-miR-150	AC122398.2	1	1	1	1	0	1	1	6
mmu-miR-150	Dhx36	1	1	1	1	0	1	1	6
mmu-miR-15a	Ywhaq	1	1	1	1	1	0	1	6
mmu-miR-15a	Abhd13	1	1	1	1	0	1	1	6
mmu-miR-15a	Dync1i1	1	1	1	1	1	0	1	6
mmu-miR-15a	Tcfap2d	1	1	1	1	1	0	1	6
mmu-miR-15a	Arl2	1	1	1	1	0	1	1	6
mmu-miR-15a	Sil1	1	1	1	1	0	1	1	6
mmu-miR-15a	Carm1	1	1	1	1	0	1	1	6
mmu-miR-15a	Dmtf1	1	1	1	1	0	1	1	6
mmu-miR-15a	Rspo3	1	1	1	1	0	1	1	6
mmu-miR-15a	Hspa4l	1	1	1	1	0	1	1	6
mmu-miR-15a	Narg1	1	1	0	1	1	1	1	6
mmu-miR-15a	Wapal	1	1	1	1	0	1	1	6
mmu-miR-15a	Srpr	1	1	1	1	0	1	1	6
mmu-miR-15a	Tmem55a	1	1	1	1	0	1	1	6
mmu-miR-15a	Wwp1	1	1	1	1	0	1	1	6
mmu-miR-15a	Mobkl3	1	1	1	1	1	0	1	6
mmu-miR-15a	Gpr63	1	1	1	1	0	1	1	6
mmu-miR-15a	Eif2b2	1	1	1	1	0	1	1	6
mmu-miR-15a	Plrg1	1	1	1	1	0	1	1	6
mmu-miR-15a	Nlrx1	1	1	1	1	0	1	1	6
mmu-miR-15a	Kank1	1	1	0	1	1	1	1	6
mmu-miR-15a	Smad7	1	1	1	1	0	1	1	6
mmu-miR-15a	Casr	1	1	1	1	0	1	1	6
mmu-miR-15a	Serbp1	1	1	1	1	1	0	1	6
mmu-miR-15a	Sidt2	1	1	1	1	0	1	1	6
mmu-miR-15a	Rabl3	1	1	1	1	0	1	1	6
mmu-miR-15a	Lats2	1	1	1	1	0	1	1	6
mmu-miR-15a	Arhgap20	1	1	1	1	1	0	1	6
mmu-miR-15a	Bag5	1	1	1	1	0	1	1	6
mmu-miR-15a	Btrc	1	1	1	1	0	1	1	6
mmu-miR-15a	Ccne1	1	1	1	1	1	0	1	6
mmu-miR-15a	Nup210	1	1	1	1	0	1	1	6
mmu-miR-15a	Taf5	1	1	1	1	0	1	1	6
mmu-miR-15a	Lhx3	1	1	1	1	0	1	1	6
mmu-miR-15a	Ap3b1	1	1	1	1	0	1	1	6
mmu-miR-15a	Shoc2	1	1	1	1	0	1	1	6
mmu-miR-15a	Pcdh17	1	1	0	1	1	1	1	6
mmu-miR-15a	Dct	1	1	1	1	0	1	1	6
mmu-miR-15a	Eif3a	1	1	1	1	0	1	1	6
mmu-miR-15a	Tarbp2	1	1	1	1	0	1	1	6
mmu-miR-15a	Raf1	1	1	1	1	1	0	1	6
mmu-miR-15a	D4Bwg0951e	1	1	1	1	1	1	0	6
mmu-miR-15a	Ppap2a	1	1	1	1	0	1	1	6
mmu-miR-15a	Phf19	1	1	1	1	1	0	1	6
mmu-miR-15a	Prkrir	1	1	1	1	0	1	1	6
mmu-miR-15a	Wbp11	1	1	1	1	0	1	1	6
mmu-miR-15a	Rnf10	1	1	1	1	0	1	1	6
mmu-miR-15a	Usp33	1	1	1	1	0	1	1	6
mmu-miR-15a	Arpp21	1	1	1	1	0	1	1	6
mmu-miR-15a	Akt3	1	1	1	1	1	0	1	6
mmu-miR-15a	Wsb1	1	1	1	1	0	1	1	6
mmu-miR-15a	Usp42	1	1	1	1	1	0	1	6
mmu-miR-15a	Cox11	1	1	1	1	0	1	1	6
mmu-miR-15a	Ube4b	1	1	1	1	1	0	1	6
mmu-miR-15a	Pak7	1	1	0	1	1	1	1	6
mmu-miR-15a	Tasp1	1	1	1	1	0	1	1	6
mmu-miR-15a	Fkbp1a	1	1	1	1	0	1	1	6
mmu-miR-15a	Helz	1	1	0	1	1	1	1	6
mmu-miR-15a	Fasn	1	1	1	1	0	1	1	6
mmu-miR-183	Ss18	1	1	1	1	0	1	1	6
mmu-miR-183	Slc35a1	1	1	1	1	0	1	1	6
mmu-miR-183	Plekha5	1	1	1	1	0	1	1	6
mmu-miR-183	Spry2	1	1	1	1	0	1	1	6
mmu-miR-183	Map3k4	1	1	1	1	1	0	1	6
mmu-miR-183	Slain1	1	1	1	1	0	1	1	6
mmu-miR-183	Kif2a	1	1	1	1	0	1	1	6
mmu-miR-183	Ezr	1	1	1	1	0	1	1	6
mmu-miR-183	Zfyve26	1	1	1	1	0	1	1	6
mmu-miR-183	Tmpo	1	1	1	1	0	1	1	6
mmu-miR-183	Dpp8	1	1	1	1	0	1	1	6
mmu-miR-193	Armc1	1	1	1	1	0	1	1	6
mmu-miR-193	Cnot6	1	1	1	1	0	1	1	6
mmu-miR-193	Calm1	1	1	1	1	1	0	1	6
mmu-miR-193	Ap2m1	1	1	1	1	0	1	1	6
mmu-miR-193	Gba2	1	1	1	1	0	1	1	6
mmu-miR-193	Ctdspl2	1	1	1	1	1	0	1	6
mmu-miR-193	Abcc4	1	1	1	1	0	1	1	6
mmu-miR-20a	Map3k8	1	1	1	1	0	1	1	6
mmu-miR-20a	Nol4	1	1	1	1	1	0	1	6
mmu-miR-20a	Snx16	1	1	1	1	0	1	1	6
mmu-miR-20a	Map3k5	1	1	1	1	1	0	1	6
mmu-miR-20a	Arhgef3	1	1	1	1	1	0	1	6
mmu-miR-20a	Fgd4	1	1	1	1	0	1	1	6
mmu-miR-20a	CT025653.7-201	1	1	1	1	1	0	1	6
mmu-miR-20a	Styx	1	1	1	1	1	0	1	6
mmu-miR-20a	Ddhd1	1	1	1	1	0	1	1	6
mmu-miR-20a	Obfc2a	1	1	1	1	1	0	1	6
mmu-miR-20a	Ube3c	1	1	1	1	0	1	1	6
mmu-miR-20a	Nedd4l	1	1	1	1	0	1	1	6
mmu-miR-20a	Mapre3	1	1	1	1	0	1	1	6
mmu-miR-20a	Bmpr2	1	1	1	1	1	0	1	6
mmu-miR-20a	Rps6ka5	1	1	1	1	0	1	1	6
mmu-miR-20a	Ints6	1	1	1	1	0	1	1	6
mmu-miR-20a	Mastl	1	1	1	1	0	1	1	6
mmu-miR-20a	Spopl	1	1	1	1	0	1	1	6
mmu-miR-20a	Epha4	1	1	1	1	1	0	1	6
mmu-miR-20a	Asb3	1	1	1	1	0	1	1	6
mmu-miR-20a	Rb1	1	1	1	1	0	1	1	6
mmu-miR-20a	Atg16l1	1	1	1	1	0	1	1	6
mmu-miR-20a	Fmnl3	1	1	1	1	0	1	1	6
mmu-miR-20a	Tnfrsf21	1	1	1	1	0	1	1	6
mmu-miR-20a	Itfg1	1	1	1	1	0	1	1	6
mmu-miR-20a	Usp3	1	1	1	1	1	0	1	6
mmu-miR-20a	Gtf2h2	1	1	1	1	0	1	1	6
mmu-miR-20a	Magi3	1	1	1	1	0	1	1	6
mmu-miR-20a	AC140392.3	1	1	1	1	0	1	1	6
mmu-miR-20a	Xrn1	1	1	1	1	0	1	1	6
mmu-miR-20a	Tanc1	1	1	1	1	1	0	1	6
mmu-miR-20a	Ssx2ip	1	1	0	1	1	1	1	6
mmu-miR-20a	Rbbp7	1	1	1	1	0	1	1	6
mmu-miR-20a	Lhx8	1	1	1	1	0	1	1	6
mmu-miR-20a	Eif4g2	1	1	1	1	1	0	1	6
mmu-miR-20a	Btbd10	1	1	1	1	0	1	1	6
mmu-miR-20a	Pde3b	1	1	1	1	0	1	1	6
mmu-miR-20a	Alx4	1	1	0	1	1	1	1	6
mmu-miR-20a	Rnf6	1	1	1	1	1	0	1	6
mmu-miR-20a	Hlf	1	1	1	1	1	0	1	6
mmu-miR-21	Elf2	1	1	1	1	1	0	1	6
mmu-miR-21	Aspn	1	1	1	1	0	1	1	6
mmu-miR-21	Stag2	1	1	1	1	0	1	1	6
mmu-miR-21	Tgfbi	1	1	1	1	0	1	1	6
mmu-miR-21	Xkr6	1	1	0	1	1	1	1	6
mmu-miR-21	Spata9	1	1	1	1	0	1	1	6
mmu-miR-21	Ntf3	1	1	1	1	0	1	1	6
mmu-miR-295	Ncoa7	1	1	1	1	0	1	1	6
mmu-miR-295	Luc7l2	1	1	1	1	0	1	1	6
mmu-miR-295	Pus3	1	1	1	1	0	1	1	6
mmu-miR-295	Irf2	1	1	1	1	1	0	1	6
mmu-miR-295	Ubl7	1	1	1	1	0	1	1	6
mmu-miR-295	Ankrd32	1	1	1	1	0	1	1	6
mmu-miR-295	Fbxl3	1	1	1	1	0	1	1	6
mmu-miR-295	Ralgds	1	1	1	1	0	1	1	6
mmu-miR-295	Clip4	1	1	1	1	0	1	1	6
mmu-miR-295	E2f7	1	1	1	1	1	0	1	6
mmu-miR-295	Adamts18	1	1	1	1	0	1	1	6
mmu-miR-295	Dyrk2	1	1	1	1	0	1	1	6
mmu-miR-295	Brp44	1	1	1	1	0	1	1	6
mmu-miR-295	Mtf1	1	1	1	1	1	0	1	6
mmu-miR-295	Mnt	1	1	1	1	1	0	1	6
mmu-miR-295	Abca5	1	1	1	1	0	1	1	6
mmu-miR-29a	Snx4	1	1	1	1	0	1	1	6
mmu-miR-29a	Csda	1	1	0	1	1	1	1	6
mmu-miR-29a	Dnmt3a	1	1	1	1	1	0	1	6
mmu-miR-29a	Smek2	1	1	0	1	1	1	1	6
mmu-miR-29a	Pmp22	1	1	1	1	1	0	1	6
mmu-miR-29a	Col5a2	1	1	1	1	0	1	1	6
mmu-miR-29a	Blmh	1	1	1	1	0	1	1	6
mmu-miR-29a	Chsy1	1	1	1	1	0	1	1	6
mmu-miR-29a	Pan2	1	1	1	1	0	1	1	6
mmu-miR-29a	Col4a1	1	1	1	1	0	1	1	6
mmu-miR-29a	Yy1	1	1	0	1	1	1	1	6
mmu-miR-29a	Fbn1	1	1	1	1	1	0	1	6
mmu-miR-29a	Nkrf	1	1	1	1	0	1	1	6
mmu-miR-29a	Nckipsd	1	1	1	1	0	1	1	6
mmu-miR-29a	Abcb6	1	1	1	1	0	1	1	6
mmu-miR-29a	Camk2g	1	1	1	1	0	1	1	6
mmu-miR-29a	Smpd3	1	1	1	1	1	0	1	6
mmu-miR-300	Smap1	1	1	1	1	0	1	1	6
mmu-miR-300	Cdk9	1	1	1	1	0	1	1	6
mmu-miR-300	Rc3h2	1	1	1	1	0	1	1	6
mmu-miR-300	Arntl	1	1	1	1	0	1	1	6
mmu-miR-300	Tex2	1	1	1	1	0	1	1	6
mmu-miR-30b	Ube2j1	1	1	1	1	1	0	1	6
mmu-miR-30b	Pank3	1	1	1	1	0	1	1	6
mmu-miR-30b	Acvr1	1	1	1	1	1	0	1	6
mmu-miR-30b	Igf2bp1	1	1	1	1	0	1	1	6
mmu-miR-30b	Vkorc1l1	1	1	1	1	1	0	1	6
mmu-miR-30b	Pip4k2a	1	1	1	1	1	0	1	6
mmu-miR-30b	Galnt1	1	1	1	1	1	1	0	6
mmu-miR-30b	Atg5	1	1	1	1	1	0	1	6
mmu-miR-30b	Exoc6	1	1	1	1	0	1	1	6
mmu-miR-30b	Elmod2	1	1	1	1	1	0	1	6
mmu-miR-30b	Ube2v2	1	1	1	1	1	0	1	6
mmu-miR-30b	Scin	1	1	1	1	0	1	1	6
mmu-miR-30b	Ngdn	1	1	1	1	0	1	1	6
mmu-miR-30b	Slc25a14	1	1	1	1	0	1	1	6
mmu-miR-30b	Pitpnm2	1	1	1	1	1	0	1	6
mmu-miR-30b	Ppargc1b	1	1	1	1	1	0	1	6
mmu-miR-30b	Stk39	1	1	1	1	1	0	1	6
mmu-miR-30b	Rfxdc1	1	1	1	1	1	0	1	6
mmu-miR-30b	Large	1	1	1	1	1	0	1	6
mmu-miR-30b	Rev1	1	1	1	1	1	0	1	6
mmu-miR-30b	Capn7	1	1	1	1	0	1	1	6
mmu-miR-30b	Actc1	1	1	1	1	0	1	1	6
mmu-miR-30b	Herc2	1	1	1	1	0	1	1	6
mmu-miR-30b	Ndel1	1	1	1	1	1	0	1	6
mmu-miR-30b	Ppp1r12a	1	1	1	1	0	1	1	6
mmu-miR-30b	Vit	1	1	1	1	0	1	1	6
mmu-miR-30b	Gnai2	1	1	1	1	0	1	1	6
mmu-miR-30b	Rap1b	1	1	1	1	1	0	1	6
mmu-miR-30b	Pcdh20	1	1	1	1	0	1	1	6
mmu-miR-30b	Fbxo34	1	1	1	1	1	0	1	6
mmu-miR-30b	Arid5b	1	1	1	1	1	0	1	6
mmu-miR-30b	Snx18	1	1	1	1	1	0	1	6
mmu-miR-30b	Odz3	1	1	1	1	1	0	1	6
mmu-miR-30b	Cthrc1	1	1	1	1	0	1	1	6
mmu-miR-30b	Snai1	1	1	1	1	1	0	1	6
mmu-miR-30b	Lrrc8d	1	1	0	1	1	1	1	6
mmu-miR-30b	Socs3	1	1	1	1	1	0	1	6
mmu-miR-33	Strbp	1	1	1	1	0	1	1	6
mmu-miR-33	Eef1a1	1	1	0	1	1	1	1	6
mmu-miR-33	Cutc	1	1	1	1	0	1	1	6
mmu-miR-33	Clpx	1	1	1	1	0	1	1	6
mmu-miR-33	Kif15	1	1	1	1	0	1	1	6
mmu-miR-33	Kcna1	1	1	1	1	0	1	1	6
mmu-miR-376b	Itgb5	1	1	1	1	0	1	1	6
mmu-miR-376b	Mynn	1	1	1	1	0	1	1	6
mmu-miR-376b	Khdrbs3	1	1	1	1	0	1	1	6
mmu-miR-127	Klhl14	1	1	1	1	0	0	1	5
mmu-miR-127	Ercc3	1	1	0	1	0	1	1	5
mmu-miR-127	Hbegf	1	1	1	1	0	0	1	5
mmu-miR-127	Bnip1	1	1	0	1	0	1	1	5
mmu-miR-127	Zfyve1	1	1	0	1	0	1	1	5
mmu-miR-127	Arhgef11	1	1	0	1	0	1	1	5
mmu-miR-127	Cisd1	1	1	1	1	0	0	1	5
mmu-miR-127	Zswim4	1	1	1	1	0	0	1	5
mmu-miR-127	Phox2b	1	1	0	1	0	1	1	5
mmu-miR-127	Hoxc6	1	1	0	1	0	1	1	5
mmu-miR-127	Cd9	1	1	0	1	0	1	1	5
mmu-miR-127	Gan	1	1	0	1	0	1	1	5
mmu-miR-127	Adh4	1	1	0	1	0	1	1	5
mmu-miR-127	Hoxd10	1	1	0	1	0	1	1	5
mmu-miR-127	Setd8	1	1	0	1	0	1	1	5
mmu-miR-127	Trib3	1	1	1	1	0	0	1	5
mmu-miR-136	Dock1	1	1	0	1	0	1	1	5
mmu-miR-136	D3Bwg0562e	1	1	1	1	0	0	1	5
mmu-miR-136	Lrrc59	1	1	1	1	0	0	1	5
mmu-miR-136	Nisch	1	1	1	1	0	0	1	5
mmu-miR-136	Lrrc58	1	1	1	1	0	0	1	5
mmu-miR-136	Hnrph1	1	1	1	1	0	0	1	5
mmu-miR-136	Gria1	1	1	1	1	0	0	1	5
mmu-miR-136	Ammecr1l	1	1	1	1	0	0	1	5
mmu-miR-136	Adcy2	1	1	0	1	0	1	1	5
mmu-miR-136	Acin1	1	1	0	1	0	1	1	5
mmu-miR-136	Prpf38b	1	1	1	1	0	0	1	5
mmu-miR-136	Prdm8	1	1	1	1	0	0	1	5
mmu-miR-136	Npc1	1	1	1	1	0	1	0	5
mmu-miR-136	Mobkl1a	1	1	0	1	0	1	1	5
mmu-miR-136	Svil	1	1	1	0	0	1	1	5
mmu-miR-136	Rab27b	1	1	1	1	0	0	1	5
mmu-miR-136	Tmem161b	1	1	1	1	0	0	1	5
mmu-miR-136	Lnpep	1	1	1	1	0	0	1	5
mmu-miR-136	Atrn	1	1	1	1	0	0	1	5
mmu-miR-136	Rcan2	1	1	1	1	0	0	1	5
mmu-miR-136	Mtmr4	1	1	1	1	0	0	1	5
mmu-miR-136	Smarcd1	1	1	0	1	0	1	1	5
mmu-miR-136	Arf6	1	1	1	1	0	0	1	5
mmu-miR-136	Snx30	1	1	1	1	0	0	1	5
mmu-miR-136	Mrps9	1	1	0	1	0	1	1	5
mmu-miR-136	Cndp2	1	1	0	1	0	1	1	5
mmu-miR-136	Eml4	1	1	0	1	0	1	1	5
mmu-miR-136	Slc7a3	1	1	1	1	0	0	1	5
mmu-miR-136	Mtpn	1	1	1	1	0	0	1	5
mmu-miR-136	2610207I05Rik	1	1	1	1	0	0	1	5
mmu-miR-136	Rgs4	1	1	1	1	0	0	1	5
mmu-miR-136	Agpat9	1	1	1	1	0	0	1	5
mmu-miR-136	Dtx4	1	1	1	1	0	0	1	5
mmu-miR-136	Cxcl3	1	1	1	1	0	0	1	5
mmu-miR-136	Pgs1	1	1	0	1	0	1	1	5
mmu-miR-136	Ndrg4	1	1	1	1	0	0	1	5
mmu-miR-136	Mapk10	1	1	1	1	0	0	1	5
mmu-miR-136	Cbl	1	1	1	1	0	0	1	5
mmu-miR-136	Tbk1	1	1	0	1	0	1	1	5
mmu-miR-136	Sfrs1	1	1	1	1	0	0	1	5
mmu-miR-136	Dixdc1	1	1	1	1	0	0	1	5
mmu-miR-136	D10Ertd610e	1	1	0	1	0	1	1	5
mmu-miR-136	Tnpo1	1	1	1	1	0	0	1	5
mmu-miR-136	Ctnnbip1	1	1	1	1	0	0	1	5
mmu-miR-136	Abcb1a	1	1	1	1	0	1	0	5
mmu-miR-136	Neo1	1	1	0	1	0	1	1	5
mmu-miR-136	Extl3	1	1	1	1	0	0	1	5
mmu-miR-136	Pvrl1	1	1	1	1	0	0	1	5
mmu-miR-136	Gdi2	1	1	1	1	0	0	1	5
mmu-miR-136	Myb	1	1	1	1	0	0	1	5
mmu-miR-136	Epha3	1	1	1	1	0	0	1	5
mmu-miR-136	Icos	1	1	1	1	0	0	1	5
mmu-miR-136	Cpeb3	1	1	1	1	0	0	1	5
mmu-miR-136	Mrps33	1	1	1	1	0	0	1	5
mmu-miR-136	D930005D10Rik	1	1	1	1	0	0	1	5
mmu-miR-136	Rybp	1	1	0	1	1	0	1	5
mmu-miR-136	Serp1	1	1	0	1	0	1	1	5
mmu-miR-136	Wdr51b	1	1	1	1	0	0	1	5
mmu-miR-136	Ddx52	1	1	0	1	0	1	1	5
mmu-miR-136	Zfp667	1	1	1	1	0	0	1	5
mmu-miR-136	Yes1	1	1	1	1	0	0	1	5
mmu-miR-136	Aph1a	1	1	0	1	0	1	1	5
mmu-miR-136	Sfrs2	1	1	0	1	0	1	1	5
mmu-miR-136	Ap1b1	1	1	0	1	0	1	1	5
mmu-miR-136	Pprc1	1	1	1	1	0	0	1	5
mmu-miR-136	Hectd3	1	1	1	1	0	0	1	5
mmu-miR-136	Rab28	1	1	0	1	0	1	1	5
mmu-miR-136	Zcchc3	1	1	1	1	0	0	1	5
mmu-miR-136	Chmp7	1	1	0	1	0	1	1	5
mmu-miR-136	Nup153	1	1	0	1	0	1	1	5
mmu-miR-136	Negr1	1	1	1	1	0	0	1	5
mmu-miR-136	Klf3	1	1	1	1	0	0	1	5
mmu-miR-136	Tm9sf3	1	1	1	1	0	0	1	5
mmu-miR-136	Ccdc135	1	1	0	1	0	1	1	5
mmu-miR-136	B230380D07Rik	1	1	1	1	0	0	1	5
mmu-miR-136	Tollip	1	1	1	1	0	0	1	5
mmu-miR-136	Nrk	1	1	0	1	0	1	1	5
mmu-miR-136	Rap2c	1	1	1	1	0	0	1	5
mmu-miR-136	Rab21	1	1	0	1	0	1	1	5
mmu-miR-136	Nts	1	1	0	1	0	1	1	5
mmu-miR-136	Igfbp2	1	1	0	1	0	1	1	5
mmu-miR-136	Mgea5	1	1	0	1	0	1	1	5
mmu-miR-136	Jazf1	1	1	0	1	0	1	1	5
mmu-miR-136	Myoz1	1	1	0	1	0	1	1	5
mmu-miR-136	Lrrc3	1	1	1	1	0	0	1	5
mmu-miR-136	Mmp13	1	1	1	1	0	0	1	5
mmu-miR-136	Gad1	1	1	0	1	0	1	1	5
mmu-miR-136	Bhlhb5	1	1	0	1	0	1	1	5
mmu-miR-136	Tbc1d9	1	0	1	1	0	1	1	5
mmu-miR-136	Cdkn2aip	1	1	1	1	0	1	0	5
mmu-miR-136	Phtf1	1	1	0	1	0	1	1	5
mmu-miR-136	Hist2h2be	1	1	1	1	0	0	1	5
mmu-miR-136	Slc35a5	1	1	1	1	0	0	1	5
mmu-miR-136	Megf9	1	1	1	1	0	0	1	5
mmu-miR-136	Crebzf	1	1	1	1	0	0	1	5
mmu-miR-136	Trim26	1	1	1	1	0	0	1	5
mmu-miR-136	Bbs2	1	1	1	1	0	0	1	5
mmu-miR-136	Zfpm2	1	1	0	1	0	1	1	5
mmu-miR-136	Txndc17	1	1	1	1	0	0	1	5
mmu-miR-136	Dld	1	1	1	1	0	0	1	5
mmu-miR-136	Plaa	1	1	1	1	0	0	1	5
mmu-miR-136	Yaf2	0	1	1	1	0	1	1	5
mmu-miR-136	Etf1	1	1	1	1	0	0	1	5
mmu-miR-136	Elovl3	1	1	1	1	0	0	1	5
mmu-miR-136	Ctnna1	1	1	0	1	0	1	1	5
mmu-miR-136	Lig4	1	1	0	1	0	1	1	5
mmu-miR-136	Xiap	1	1	1	1	0	0	1	5
mmu-miR-136	Itga5	1	1	0	1	0	1	1	5
mmu-miR-136	Hoxa10	1	1	1	1	0	0	1	5
mmu-miR-136	Rpusd4	1	1	1	1	0	0	1	5
mmu-miR-136	Smek1	1	1	0	1	0	1	1	5
mmu-miR-136	Matn2	1	1	1	1	0	0	1	5
mmu-miR-136	Cwf19l1	1	1	0	1	0	1	1	5
mmu-miR-136	Cttnbp2	1	1	1	1	0	0	1	5
mmu-miR-136	Zfp160	1	1	1	1	0	0	1	5
mmu-miR-136	Wdr48	1	1	0	1	0	1	1	5
mmu-miR-136	Znrf2	1	1	0	1	0	1	1	5
mmu-miR-136	Gsdma1	1	1	1	1	0	0	1	5
mmu-miR-136	Cyfip1	1	0	1	1	0	1	1	5
mmu-miR-136	Uevld	1	1	1	1	0	0	1	5
mmu-miR-136	Cntn2	1	1	1	1	0	0	1	5
mmu-miR-136	Zwilch	1	1	1	1	0	1	0	5
mmu-miR-136	Asph	1	1	1	1	0	0	1	5
mmu-miR-136	Arhgap29	1	1	0	1	0	1	1	5
mmu-miR-136	Bcl9	1	1	0	1	0	1	1	5
mmu-miR-136	Rnf139	1	1	1	1	0	0	1	5
mmu-miR-136	Prdm16	1	1	1	1	0	0	1	5
mmu-miR-136	Suv39h1	1	1	1	1	0	0	1	5
mmu-miR-136	Clic6	1	1	1	1	0	0	1	5
mmu-miR-136	Kctd3	1	1	0	1	0	1	1	5
mmu-miR-136	Irak2	1	1	1	1	0	0	1	5
mmu-miR-136	Bahd1	1	1	0	1	0	1	1	5
mmu-miR-136	Pdcd4	1	1	1	1	0	0	1	5
mmu-miR-136	Heatr6	1	1	1	1	0	1	0	5
mmu-miR-136	Sel1l	1	1	1	1	0	0	1	5
mmu-miR-136	Paqr9	1	1	0	1	0	1	1	5
mmu-miR-136	Jmjd1a	1	1	0	1	0	1	1	5
mmu-miR-136	Fos	1	1	0	1	1	1	0	5
mmu-miR-136	Brunol4	1	1	0	1	0	1	1	5
mmu-miR-136	Trim59	1	1	1	1	0	0	1	5
mmu-miR-136	Mecp2	1	1	1	1	0	0	1	5
mmu-miR-136	Got2	1	1	0	1	0	1	1	5
mmu-miR-136	Copz1	1	1	1	1	0	0	1	5
mmu-miR-136	Mtap7d1	1	1	0	1	0	1	1	5
mmu-miR-141	Zswim5	1	1	0	1	0	1	1	5
mmu-miR-141	Tsga14	1	1	1	1	0	0	1	5
mmu-miR-141	Crot	1	1	1	1	0	0	1	5
mmu-miR-141	Tmem56	1	1	1	1	0	0	1	5
mmu-miR-141	Htr5a	1	1	1	1	0	0	1	5
mmu-miR-141	Hoxb5	1	1	0	1	0	1	1	5
mmu-miR-141	Pdgfc	1	1	0	1	0	1	1	5
mmu-miR-141	Hira	1	1	0	1	0	1	1	5
mmu-miR-141	Sugt1	1	1	1	1	0	0	1	5
mmu-miR-141	BC043098	1	1	1	1	0	0	1	5
mmu-miR-141	Acvr1c	1	1	1	1	0	0	1	5
mmu-miR-141	Zxdb	1	1	0	1	0	1	1	5
mmu-miR-141	Fgfr1op	1	1	1	1	0	0	1	5
mmu-miR-141	Atrnl1	1	1	1	1	0	0	1	5
mmu-miR-141	Cdk8	1	1	1	1	0	1	0	5
mmu-miR-141	Plscr4	1	1	1	1	0	0	1	5
mmu-miR-141	Crnkl1	1	1	0	1	0	1	1	5
mmu-miR-141	Khdrbs1	1	1	1	1	0	0	1	5
mmu-miR-141	Ppp1r3d	1	1	1	1	0	0	1	5
mmu-miR-141	Klhl7	1	1	0	1	0	1	1	5
mmu-miR-141	Foxp2	1	1	0	1	1	0	1	5
mmu-miR-141	Prpf4b	1	1	0	1	0	1	1	5
mmu-miR-141	Adipor2	1	1	1	1	0	0	1	5
mmu-miR-141	Gpc2	1	1	1	1	0	0	1	5
mmu-miR-141	Prdm5	1	1	0	1	0	1	1	5
mmu-miR-141	Fig4	1	1	0	1	0	1	1	5
mmu-miR-141	Lhfp	1	1	1	1	0	0	1	5
mmu-miR-141	Serpinb2	1	1	1	1	0	0	1	5
mmu-miR-141	Nudcd1	1	1	1	1	0	0	1	5
mmu-miR-141	Camk2d	1	1	1	1	0	0	1	5
mmu-miR-141	Rb1cc1	1	1	1	1	0	0	1	5
mmu-miR-141	Adh7	1	1	1	1	0	0	1	5
mmu-miR-141	Slc17a6	1	1	0	1	0	1	1	5
mmu-miR-141	Mtf2	1	1	1	1	0	0	1	5
mmu-miR-141	Prkcb1	1	1	1	1	0	0	1	5
mmu-miR-141	Dclre1b	1	1	1	1	0	0	1	5
mmu-miR-141	St8sia4	1	1	1	1	0	0	1	5
mmu-miR-141	Foxk2	1	1	1	1	0	0	1	5
mmu-miR-141	Unc5c	1	1	1	1	0	0	1	5
mmu-miR-141	Dusp2	1	1	1	1	0	0	1	5
mmu-miR-141	Txnip	1	1	1	1	0	0	1	5
mmu-miR-141	Ugp2	1	1	1	1	0	0	1	5
mmu-miR-141	Narg2	1	1	1	1	0	0	1	5
mmu-miR-141	Ppm1e	1	1	1	1	0	0	1	5
mmu-miR-141	Bicd2	1	1	1	1	0	0	1	5
mmu-miR-141	Corin	1	1	1	1	0	0	1	5
mmu-miR-141	Zeb1	1	1	1	1	0	1	0	5
mmu-miR-141	Cnr1	1	1	1	1	0	0	1	5
mmu-miR-141	Rbm41	1	1	1	1	0	0	1	5
mmu-miR-141	Ccdc80	1	1	1	1	0	0	1	5
mmu-miR-141	Bmper	1	1	0	1	0	1	1	5
mmu-miR-141	Gls2	1	1	0	1	0	1	1	5
mmu-miR-141	Cep76	1	1	0	1	0	1	1	5
mmu-miR-141	1810055E12Rik	1	1	1	1	0	0	1	5
mmu-miR-141	Zfand5	1	1	0	1	0	1	1	5
mmu-miR-141	Clock	1	1	1	1	0	0	1	5
mmu-miR-141	Mtmr6	1	1	1	1	0	0	1	5
mmu-miR-141	Ipo9	1	1	0	1	0	1	1	5
mmu-miR-141	Klf12	1	1	1	1	0	0	1	5
mmu-miR-141	Fbxl2	1	1	1	1	0	0	1	5
mmu-miR-141	Csnk1e	1	1	0	1	0	1	1	5
mmu-miR-141	Socs7	1	1	1	1	0	0	1	5
mmu-miR-141	Myh10	1	1	1	1	0	0	1	5
mmu-miR-141	0910001A06Rik	1	1	1	1	0	0	1	5
mmu-miR-141	Olfm1	1	0	1	1	1	0	1	5
mmu-miR-141	Vsig8	1	1	0	1	0	1	1	5
mmu-miR-141	Piga	1	1	1	1	0	0	1	5
mmu-miR-141	Psmd5	1	1	0	1	0	1	1	5
mmu-miR-141	Coq10b	1	1	1	1	0	0	1	5
mmu-miR-141	Klhl24	1	1	1	1	0	0	1	5
mmu-miR-141	Rsbn1	1	1	1	1	0	0	1	5
mmu-miR-141	Bud13	1	1	0	1	0	1	1	5
mmu-miR-141	Aacs	1	1	0	1	0	1	1	5
mmu-miR-141	Mbd5	0	1	1	1	0	1	1	5
mmu-miR-141	Dlc1	1	1	1	1	0	0	1	5
mmu-miR-141	Tppp	1	1	1	1	0	0	1	5
mmu-miR-141	Gabrp	1	1	1	1	0	0	1	5
mmu-miR-141	Ak2	1	1	1	1	0	0	1	5
mmu-miR-141	Rab15	1	1	1	1	0	0	1	5
mmu-miR-141	Rcbtb2	1	1	1	1	0	0	1	5
mmu-miR-141	Gna13	1	1	1	1	0	0	1	5
mmu-miR-141	Lrfn2	1	1	1	1	0	1	0	5
mmu-miR-141	Zyg11b	1	1	1	1	0	0	1	5
mmu-miR-141	Asah1	1	1	1	1	0	0	1	5
mmu-miR-141	Hmg20a	1	1	1	1	0	0	1	5
mmu-miR-141	Dok5	1	1	0	1	0	1	1	5
mmu-miR-141	Eif3b	1	1	0	1	0	1	1	5
mmu-miR-141	Cadps2	0	1	1	1	0	1	1	5
mmu-miR-141	Zbtb6	1	1	1	1	0	0	1	5
mmu-miR-141	Sfrs12	1	1	0	1	0	1	1	5
mmu-miR-141	Rae1	1	1	0	1	0	1	1	5
mmu-miR-141	Rint1	1	1	1	1	0	1	0	5
mmu-miR-141	Cdc2l6	1	1	1	1	0	0	1	5
mmu-miR-141	Tmem135	1	1	1	1	0	0	1	5
mmu-miR-141	Tanc2	1	1	1	1	0	0	1	5
mmu-miR-141	Spg3a	1	1	0	1	0	1	1	5
mmu-miR-141	Ccdc39	1	1	0	1	0	1	1	5
mmu-miR-141	Osbpl8	1	1	1	1	0	0	1	5
mmu-miR-141	Dek	1	1	1	1	0	0	1	5
mmu-miR-141	Nlgn2	1	1	1	1	0	0	1	5
mmu-miR-141	Ttc25	1	1	0	1	0	1	1	5
mmu-miR-141	Pggt1b	1	1	1	1	0	0	1	5
mmu-miR-141	Klhl28	1	1	1	1	0	0	1	5
mmu-miR-141	Mlstd2	1	1	1	1	0	0	1	5
mmu-miR-141	Nat13	1	1	1	1	0	0	1	5
mmu-miR-141	Gata6	1	1	0	1	0	1	1	5
mmu-miR-141	Elac1	1	1	0	1	0	1	1	5
mmu-miR-141	Sell	1	1	1	1	0	0	1	5
mmu-miR-141	Stxbp4	1	1	0	1	0	1	1	5
mmu-miR-141	Ppef1	1	1	1	1	0	0	1	5
mmu-miR-141	Ccng2	1	1	1	1	0	0	1	5
mmu-miR-141	Ppp2r5c	1	1	0	1	0	1	1	5
mmu-miR-141	Src	1	1	1	1	0	0	1	5
mmu-miR-141	Rarb	1	1	0	1	0	1	1	5
mmu-miR-141	Myo5c	1	1	1	1	0	0	1	5
mmu-miR-141	Perp	1	1	1	1	0	0	1	5
mmu-miR-141	Mybl1	1	1	1	1	0	0	1	5
mmu-miR-141	Ccdc100	1	1	1	1	0	0	1	5
mmu-miR-141	Tbc1d8	1	1	0	1	0	1	1	5
mmu-miR-141	Zkscan1	1	1	1	1	0	0	1	5
mmu-miR-141	Cpt2	1	1	0	1	0	1	1	5
mmu-miR-141	C1galt1	1	1	0	1	0	1	1	5
mmu-miR-141	Shroom2	1	1	1	1	0	0	1	5
mmu-miR-141	Stx2	1	1	1	1	0	0	1	5
mmu-miR-141	Ncoa3	1	1	0	1	0	1	1	5
mmu-miR-141	Ctnnd2	1	1	1	1	0	0	1	5
mmu-miR-141	Ptpn21	1	1	0	1	0	1	1	5
mmu-miR-141	Trhde	1	1	1	1	0	0	1	5
mmu-miR-141	Rad23b	1	1	0	1	0	1	1	5
mmu-miR-141	Higd1a	1	1	1	1	0	0	1	5
mmu-miR-141	Rhpn2	1	1	0	1	0	1	1	5
mmu-miR-141	Ythdc1	1	1	0	1	0	1	1	5
mmu-miR-141	Wdtc1	1	1	0	1	0	1	1	5
mmu-miR-141	Ifrd1	1	1	1	1	0	0	1	5
mmu-miR-141	Cfdp1	1	1	0	1	0	1	1	5
mmu-miR-141	Akap6	1	1	1	1	0	0	1	5
mmu-miR-141	Lrrtm1	1	1	0	1	0	1	1	5
mmu-miR-141	Gabra4	1	1	1	1	0	0	1	5
mmu-miR-141	Rnmt	1	1	1	1	0	0	1	5
mmu-miR-141	Epha2	1	1	0	1	0	1	1	5
mmu-miR-141	Ttc14	1	1	1	1	0	0	1	5
mmu-miR-141	3110048E14Rik	1	1	1	1	0	0	1	5
mmu-miR-141	Ttll12	1	1	1	1	0	0	1	5
mmu-miR-141	Lonrf2	1	1	1	1	0	0	1	5
mmu-miR-141	Wsb2	1	1	1	1	0	0	1	5
mmu-miR-141	Dpyd	1	1	0	1	0	1	1	5
mmu-miR-141	Neurod4	1	1	1	1	0	0	1	5
mmu-miR-141	Slc23a2	1	1	1	1	0	0	1	5
mmu-miR-141	Pdcd10	1	1	1	1	0	1	0	5
mmu-miR-141	Pscd3	1	1	1	1	0	0	1	5
mmu-miR-141	Atp8a2	1	1	0	1	0	1	1	5
mmu-miR-141	Ttr	1	1	1	1	0	0	1	5
mmu-miR-141	Cds2	1	1	1	1	0	0	1	5
mmu-miR-141	Son	1	1	1	1	0	0	1	5
mmu-miR-141	Net1	1	1	0	1	0	1	1	5
mmu-miR-141	Brms1l	1	1	0	1	0	1	1	5
mmu-miR-141	Megf11	1	1	0	1	0	1	1	5
mmu-miR-141	Gucy1a3	1	1	1	1	0	0	1	5
mmu-miR-141	Cdc42	1	1	0	1	0	1	1	5
mmu-miR-141	Strn	1	1	0	1	0	1	1	5
mmu-miR-141	Chrna4	1	1	1	1	0	0	1	5
mmu-miR-141	Nsmaf	1	1	0	1	0	1	1	5
mmu-miR-141	Acvr2a	1	1	1	1	0	0	1	5
mmu-miR-141	Ercc6l	1	1	0	1	0	1	1	5
mmu-miR-141	Ulk2	1	1	1	1	0	0	1	5
mmu-miR-141	Abi2	1	1	1	1	0	0	1	5
mmu-miR-141	Tmem121	1	1	0	1	0	1	1	5
mmu-miR-141	Lin28b	1	1	1	1	0	0	1	5
mmu-miR-141	Cdh20	1	1	0	1	0	1	1	5
mmu-miR-141	Dync1li2	1	1	0	1	0	1	1	5
mmu-miR-141	Hivep2	1	1	0	1	0	1	1	5
mmu-miR-141	Tmeff1	1	1	1	1	0	0	1	5
mmu-miR-141	Suz12	1	1	0	1	0	1	1	5
mmu-miR-141	Bclaf1	1	1	1	1	0	0	1	5
mmu-miR-141	Nsl1	1	1	1	1	0	0	1	5
mmu-miR-141	Lipa	1	1	1	1	0	0	1	5
mmu-miR-141	Nt5c2	1	1	0	1	0	1	1	5
mmu-miR-141	Kcnj1	1	1	1	1	0	0	1	5
mmu-miR-141	Epha7	1	1	1	1	0	0	1	5
mmu-miR-141	Ppp3r1	1	1	0	1	1	0	1	5
mmu-miR-141	Thbd	1	1	1	1	0	0	1	5
mmu-miR-141	Elk3	1	1	0	1	0	1	1	5
mmu-miR-141	Acads	1	1	0	1	0	1	1	5
mmu-miR-141	Dhx40	1	1	0	1	0	1	1	5
mmu-miR-141	Rnf145	1	1	1	1	0	0	1	5
mmu-miR-141	Map3k3	1	1	0	1	0	1	1	5
mmu-miR-141	Fn1	1	1	0	1	0	1	1	5
mmu-miR-141	Oxct1	1	1	1	1	0	0	1	5
mmu-miR-141	Tmem110	1	1	1	1	0	0	1	5
mmu-miR-141	Camsap1l1	1	1	1	1	0	0	1	5
mmu-miR-141	Tm9sf4	1	1	0	1	0	1	1	5
mmu-miR-141	Slc20a2	1	1	0	1	0	1	1	5
mmu-miR-141	Marcks	1	1	0	1	0	1	1	5
mmu-miR-141	Rcn2	1	1	1	1	0	0	1	5
mmu-miR-141	Adck1	1	1	1	1	0	0	1	5
mmu-miR-141	Slc30a4	1	1	1	1	0	0	1	5
mmu-miR-141	Mbip	1	1	0	1	0	1	1	5
mmu-miR-141	Cnga2	1	1	0	1	0	1	1	5
mmu-miR-141	Ypel5	1	1	1	1	0	0	1	5
mmu-miR-141	Ccdc132	1	1	0	1	0	1	1	5
mmu-miR-141	Gjc1	1	1	0	1	0	1	1	5
mmu-miR-141	Gpm6b	1	1	0	1	0	1	1	5
mmu-miR-141	Ccnl2	1	1	0	1	0	1	1	5
mmu-miR-141	Sesn1	1	1	0	1	0	1	1	5
mmu-miR-141	Pgcp	1	1	0	1	0	1	1	5
mmu-miR-141	Nt5dc3	1	1	1	1	0	0	1	5
mmu-miR-141	Abl2	1	1	1	1	0	0	1	5
mmu-miR-141	Supt6h	1	1	1	1	0	0	1	5
mmu-miR-141	AC137156.3-201	1	1	1	1	0	0	1	5
mmu-miR-141	Hprt1	1	1	0	1	0	1	1	5
mmu-miR-141	Hp1bp3	1	1	0	1	0	1	1	5
mmu-miR-141	Tshz3	1	1	1	1	0	0	1	5
mmu-miR-141	Runx1t1	1	1	1	1	0	0	1	5
mmu-miR-141	Ubac1	1	1	0	1	0	1	1	5
mmu-miR-141	Tgfb2	1	1	1	1	0	0	1	5
mmu-miR-141	Psmd1	1	1	0	1	0	1	1	5
mmu-miR-141	Cry1	1	1	0	1	0	1	1	5
mmu-miR-141	Tsg101	1	1	0	1	0	1	1	5
mmu-miR-141	Slc6a4	1	1	0	1	0	1	1	5
mmu-miR-141	Gclc	1	1	0	1	0	1	1	5
mmu-miR-141	Kcnj2	1	1	0	1	1	0	1	5
mmu-miR-141	Paip2	1	1	1	1	0	0	1	5
mmu-miR-141	Nufip2	1	1	1	1	0	0	1	5
mmu-miR-141	Mbnl3	1	1	1	1	0	0	1	5
mmu-miR-141	Ruvbl1	1	1	0	1	0	1	1	5
mmu-miR-141	Cpsf6	1	1	0	1	0	1	1	5
mmu-miR-141	Foxa1	1	1	0	1	0	1	1	5
mmu-miR-141	Mmp25	1	1	1	1	0	0	1	5
mmu-miR-141	Nr3c1	1	1	1	1	0	0	1	5
mmu-miR-141	Opa1	1	1	0	1	0	1	1	5
mmu-miR-141	Setdb2	1	1	1	1	0	0	1	5
mmu-miR-141	Hmgcr	1	1	0	1	0	1	1	5
mmu-miR-141	3830406C13Rik	1	1	1	1	1	0	0	5
mmu-miR-141	Bcl2l11	1	1	1	1	0	0	1	5
mmu-miR-141	Lrrc57	1	1	1	1	0	0	1	5
mmu-miR-141	Bap1	1	1	0	1	0	1	1	5
mmu-miR-141	Fkbp5	1	1	1	1	0	0	1	5
mmu-miR-141	Efna1	1	1	1	1	0	0	1	5
mmu-miR-141	Prkaa2	1	1	0	1	0	1	1	5
mmu-miR-141	Atp6v1a	1	1	1	1	0	0	1	5
mmu-miR-141	Dnajb4	1	1	0	1	0	1	1	5
mmu-miR-141	Kank2	1	1	1	1	0	0	1	5
mmu-miR-141	Map2k4	1	1	1	1	0	0	1	5
mmu-miR-141	Sost	1	1	1	1	0	0	1	5
mmu-miR-141	Fbxl20	1	1	1	1	0	0	1	5
mmu-miR-141	Cdc42bpb	1	1	1	1	0	0	1	5
mmu-miR-141	Arl5b	1	1	1	1	0	0	1	5
mmu-miR-141	Drg1	1	1	0	1	0	1	1	5
mmu-miR-141	AC073946.23-201	1	1	1	1	0	0	1	5
mmu-miR-141	Drctnnb1a	1	1	1	1	0	0	1	5
mmu-miR-141	Lbr	1	1	1	1	0	0	1	5
mmu-miR-141	Unk	1	1	0	1	0	1	1	5
mmu-miR-141	Slc16a14	1	1	1	1	0	0	1	5
mmu-miR-141	Ythdf3	1	1	1	1	0	0	1	5
mmu-miR-141	Sacm1l	1	1	1	1	0	0	1	5
mmu-miR-141	Ttpal	1	1	1	1	0	0	1	5
mmu-miR-141	Sox17	1	1	1	1	0	0	1	5
mmu-miR-141	U2af1	1	1	0	1	0	1	1	5
mmu-miR-141	Tial1	1	1	1	1	0	0	1	5
mmu-miR-141	Ankfy1	1	1	1	1	0	0	1	5
mmu-miR-141	Bcap29	1	1	1	1	0	0	1	5
mmu-miR-141	Ampd2	1	1	1	1	0	0	1	5
mmu-miR-141	Kcng3	1	1	1	1	0	0	1	5
mmu-miR-141	Mme	1	1	1	1	0	0	1	5
mmu-miR-141	Cwc15	1	1	0	1	0	1	1	5
mmu-miR-141	Mttp	1	1	0	1	0	1	1	5
mmu-miR-141	Stat4	1	1	1	1	0	1	0	5
mmu-miR-141	Ikzf2	1	1	0	1	0	1	1	5
mmu-miR-141	Ccdc122	1	1	1	1	0	0	1	5
mmu-miR-141	Gabra2	1	1	0	1	0	1	1	5
mmu-miR-141	Atp1b1	1	1	0	1	1	1	0	5
mmu-miR-141	P4ha2	1	1	0	1	0	1	1	5
mmu-miR-141	Dusp6	1	1	1	1	0	0	1	5
mmu-miR-141	Ripk5	1	1	1	1	0	0	1	5
mmu-miR-141	Ifnar1	1	1	1	1	0	0	1	5
mmu-miR-141	Mrpl19	1	1	1	1	0	0	1	5
mmu-miR-141	Cryz	1	1	1	1	0	0	1	5
mmu-miR-141	Klf9	1	1	0	1	0	1	1	5
mmu-miR-141	Ccnf	1	1	1	1	0	0	1	5
mmu-miR-141	Shisa2	1	1	1	1	0	0	1	5
mmu-miR-141	Nap1l3	1	1	1	1	0	0	1	5
mmu-miR-141	Eaf1	1	1	1	1	0	0	1	5
mmu-miR-141	Sap30l	1	1	1	1	0	0	1	5
mmu-miR-141	Slc25a36	1	1	1	1	0	0	1	5
mmu-miR-141	4933411K20Rik	1	1	1	1	0	0	1	5
mmu-miR-141	Sep7	1	1	1	1	1	0	0	5
mmu-miR-141	C3ar1	1	1	1	1	0	0	1	5
mmu-miR-141	Spag9	1	1	1	1	0	0	1	5
mmu-miR-141	Npat	1	1	0	1	0	1	1	5
mmu-miR-141	Ube2a	1	1	1	1	0	0	1	5
mmu-miR-141	St3gal5	1	1	1	1	0	0	1	5
mmu-miR-141	Irf4	1	1	1	1	0	0	1	5
mmu-miR-141	Tubgcp3	1	1	0	1	0	1	1	5
mmu-miR-141	Fez2	1	1	1	1	0	0	1	5
mmu-miR-141	Tm4sf1	1	1	1	1	0	0	1	5
mmu-miR-141	Bcl9l	1	1	0	1	0	1	1	5
mmu-miR-141	Fbxl19	1	1	0	1	0	1	1	5
mmu-miR-141	Zranb3	1	1	0	1	0	1	1	5
mmu-miR-141	Csnk1g3	1	1	1	1	0	0	1	5
mmu-miR-141	Tbc1d1	1	1	1	1	0	0	1	5
mmu-miR-141	Ythdf2	1	1	1	1	0	0	1	5
mmu-miR-141	Camk4	1	1	1	1	0	0	1	5
mmu-miR-141	Dpy19l4	1	1	1	1	0	0	1	5
mmu-miR-141	Gli3	1	1	1	1	0	0	1	5
mmu-miR-141	Skiv2l2	1	1	0	1	0	1	1	5
mmu-miR-141	Ldb3	1	1	1	1	0	0	1	5
mmu-miR-141	Ptprz1	1	1	1	1	0	0	1	5
mmu-miR-141	Dmwd	1	1	1	1	0	0	1	5
mmu-miR-141	Ctbp2	1	0	1	1	0	1	1	5
mmu-miR-141	Hs6st2	1	1	1	1	0	0	1	5
mmu-miR-141	Mll1	1	1	1	1	0	0	1	5
mmu-miR-141	Csk	1	1	0	1	0	1	1	5
mmu-miR-141	Paip2b	1	1	1	1	0	0	1	5
mmu-miR-141	Rnft1	1	1	1	1	0	0	1	5
mmu-miR-141	AC109199.10	1	1	1	1	0	0	1	5
mmu-miR-141	Narg1l	1	1	1	1	0	0	1	5
mmu-miR-141	Aurkb	1	1	1	1	0	0	1	5
mmu-miR-141	Zbtb34	1	1	1	1	0	0	1	5
mmu-miR-141	Cyp26b1	1	1	1	1	0	0	1	5
mmu-miR-141	Erc2	1	1	1	1	0	0	1	5
mmu-miR-141	Opn5	1	1	0	1	0	1	1	5
mmu-miR-141	Laptm4a	1	1	0	1	0	1	1	5
mmu-miR-141	Als2cr4	1	1	1	1	0	0	1	5
mmu-miR-141	Clasp2	1	0	1	1	0	1	1	5
mmu-miR-141	Vsnl1	1	1	0	1	0	1	1	5
mmu-miR-141	Mamdc2	1	1	0	1	0	1	1	5
mmu-miR-141	Txndc13	1	1	1	1	0	0	1	5
mmu-miR-141	Lass6	1	1	1	1	0	0	1	5
mmu-miR-141	Hook1	1	1	1	1	0	0	1	5
mmu-miR-141	Sv2a	1	1	0	1	0	1	1	5
mmu-miR-141	Slc19a2	1	1	1	1	0	0	1	5
mmu-miR-141	1500003O03Rik	1	1	1	1	0	0	1	5
mmu-miR-141	Tmem147	1	1	0	1	0	1	1	5
mmu-miR-141	Slitrk6	1	1	0	1	0	1	1	5
mmu-miR-141	Kpna4	1	1	0	1	0	1	1	5
mmu-miR-141	Acad11	1	1	1	1	0	0	1	5
mmu-miR-141	Tlr4	1	1	1	1	0	0	1	5
mmu-miR-141	Sart1	1	1	0	1	0	1	1	5
mmu-miR-141	Dcx	1	1	1	1	0	0	1	5
mmu-miR-141	Hcn1	1	1	0	1	0	1	1	5
mmu-miR-141	Lysmd3	1	1	1	1	0	0	1	5
mmu-miR-141	Optn	1	1	1	1	0	0	1	5
mmu-miR-141	Slc16a1	1	1	1	1	0	0	1	5
mmu-miR-141	Htr2c	1	1	1	1	0	0	1	5
mmu-miR-141	Wdr44	1	1	1	1	0	0	1	5
mmu-miR-141	Cyb5	1	1	1	1	0	0	1	5
mmu-miR-141	Npal2	1	1	1	1	0	0	1	5
mmu-miR-141	Nub1	1	1	1	1	0	0	1	5
mmu-miR-141	Fat3	1	1	1	1	0	0	1	5
mmu-miR-141	Ntrk2	1	1	1	1	0	1	0	5
mmu-miR-141	Kcnc2	1	1	1	1	0	0	1	5
mmu-miR-141	Sgpp1	1	1	0	1	0	1	1	5
mmu-miR-141	Lmo3	1	1	1	1	0	0	1	5
mmu-miR-141	Calcrl	1	1	1	1	0	0	1	5
mmu-miR-141	Olr1	1	1	1	1	0	0	1	5
mmu-miR-141	Kdelc1	1	1	0	1	0	1	1	5
mmu-miR-141	Dnajc18	1	1	1	1	0	0	1	5
mmu-miR-141	Als2	1	1	1	1	0	0	1	5
mmu-miR-141	Gem	1	1	0	1	0	1	1	5
mmu-miR-141	Tcfap2c	1	1	1	1	0	0	1	5
mmu-miR-141	Grb2	1	1	1	1	0	0	1	5
mmu-miR-141	Gab1	1	1	0	1	0	1	1	5
mmu-miR-145	Ddx3y	1	1	1	1	0	0	1	5
mmu-miR-145	Arhgap12	1	1	1	1	0	0	1	5
mmu-miR-145	Smc6	1	1	0	1	0	1	1	5
mmu-miR-145	Lmbrd2	1	1	0	1	0	1	1	5
mmu-miR-145	Larp5	1	1	1	1	0	0	1	5
mmu-miR-145	Grhl1	1	1	0	1	0	1	1	5
mmu-miR-145	Rce1	1	1	0	1	0	1	1	5
mmu-miR-145	Pcmt1	1	1	0	1	0	1	1	5
mmu-miR-145	Sulf1	1	1	0	1	0	1	1	5
mmu-miR-145	Mdfic	1	1	1	1	0	0	1	5
mmu-miR-145	OTTMUSG00000000421	1	1	1	1	0	0	1	5
mmu-miR-145	Hltf	1	1	0	1	0	1	1	5
mmu-miR-145	Leng8	1	1	1	1	0	0	1	5
mmu-miR-145	Pnpla8	1	1	1	1	0	0	1	5
mmu-miR-145	Snx15	1	1	1	1	0	0	1	5
mmu-miR-145	Kcnv1	1	1	1	1	0	0	1	5
mmu-miR-145	Arhgef10	1	1	0	1	0	1	1	5
mmu-miR-145	4921533L14Rik	1	1	1	1	0	0	1	5
mmu-miR-145	Tnfrsf11b	1	1	1	1	0	0	1	5
mmu-miR-145	Epn1	1	1	0	1	0	1	1	5
mmu-miR-145	Mal2	1	1	1	1	0	0	1	5
mmu-miR-145	Tbpl1	1	1	0	1	0	1	1	5
mmu-miR-145	Praf2	1	1	1	1	0	0	1	5
mmu-miR-145	Ctgf	1	1	0	1	1	1	0	5
mmu-miR-145	Hic2	1	1	1	1	0	0	1	5
mmu-miR-145	Ahcyl2	1	1	1	1	0	0	1	5
mmu-miR-145	Fkbp3	1	1	0	1	0	1	1	5
mmu-miR-145	Zfp329	1	1	1	1	0	0	1	5
mmu-miR-145	Centd3	1	1	0	1	0	1	1	5
mmu-miR-145	Mest	1	1	1	1	0	0	1	5
mmu-miR-145	Ganab	1	1	0	1	0	1	1	5
mmu-miR-145	Mapk8ip3	1	1	0	1	0	1	1	5
mmu-miR-145	Bag4	1	1	1	1	0	0	1	5
mmu-miR-145	Ap3s1	1	1	1	1	0	1	0	5
mmu-miR-145	Sema6a	1	1	1	1	0	0	1	5
mmu-miR-145	Akr1d1	1	1	1	1	0	0	1	5
mmu-miR-145	Foxo1	1	1	1	1	0	0	1	5
mmu-miR-145	Rnf170	1	1	1	1	0	0	1	5
mmu-miR-145	Mmrn2	1	1	1	1	0	0	1	5
mmu-miR-145	Rev3l	1	1	1	1	0	0	1	5
mmu-miR-145	Qpctl	1	1	1	1	0	0	1	5
mmu-miR-145	Tirap	1	1	1	1	0	0	1	5
mmu-miR-145	Utx	1	1	0	1	0	1	1	5
mmu-miR-145	Thex1	1	1	1	1	0	0	1	5
mmu-miR-145	Rbm22	1	1	0	1	0	1	1	5
mmu-miR-145	Gpr171	1	1	1	1	0	0	1	5
mmu-miR-145	Slc40a1	1	1	0	1	0	1	1	5
mmu-miR-145	Nedd9	1	1	1	1	0	0	1	5
mmu-miR-145	Siae	1	1	1	1	0	0	1	5
mmu-miR-145	Mylip	1	0	1	1	0	1	1	5
mmu-miR-145	Ccnl1	1	1	1	1	0	0	1	5
mmu-miR-145	Grpel2	1	1	1	1	0	0	1	5
mmu-miR-145	BC035537	1	1	1	1	0	0	1	5
mmu-miR-145	Zfp647	1	1	1	1	0	0	1	5
mmu-miR-145	Ptgr2	1	1	1	1	0	0	1	5
mmu-miR-145	Insig1	1	1	1	1	0	0	1	5
mmu-miR-145	Ccnc	1	1	1	1	0	0	1	5
mmu-miR-145	Onecut2	1	1	1	1	0	0	1	5
mmu-miR-145	Aox1	1	1	0	1	0	1	1	5
mmu-miR-145	5730446C15Rik	1	1	1	1	0	0	1	5
mmu-miR-145	Slc39a2	1	1	1	1	0	0	1	5
mmu-miR-145	Dnajb12	1	1	0	1	0	1	1	5
mmu-miR-145	Pmaip1	1	1	1	1	0	0	1	5
mmu-miR-145	Atp1b4	1	1	1	1	0	0	1	5
mmu-miR-145	Sptlc1	1	1	1	1	0	0	1	5
mmu-miR-145	Me2	1	1	0	1	0	1	1	5
mmu-miR-145	Trim2	1	1	1	1	0	0	1	5
mmu-miR-145	Dio2	1	1	1	1	0	0	1	5
mmu-miR-145	Mapk4	1	1	1	1	0	0	1	5
mmu-miR-145	D19Bwg1357e	1	1	0	1	0	1	1	5
mmu-miR-145	Sgpl1	1	1	1	1	0	0	1	5
mmu-miR-145	Slc7a8	1	1	1	1	0	0	1	5
mmu-miR-145	Cdc37l1	1	1	0	1	0	1	1	5
mmu-miR-145	Mpzl2	1	1	1	1	0	0	1	5
mmu-miR-145	Camk1d	1	1	0	1	1	0	1	5
mmu-miR-145	Vps26a	1	1	1	1	0	0	1	5
mmu-miR-145	D430015B01Rik	1	1	1	1	0	0	1	5
mmu-miR-145	Nudt2	1	1	1	1	0	0	1	5
mmu-miR-145	Smarcad1	1	1	1	1	0	0	1	5
mmu-miR-145	AC164079.11-201	1	1	1	1	0	0	1	5
mmu-miR-145	Smad5	1	1	1	1	0	0	1	5
mmu-miR-145	Itih5	1	1	0	1	0	1	1	5
mmu-miR-145	Eif2ak3	1	1	0	1	0	1	1	5
mmu-miR-145	Htatsf1	1	1	1	1	0	0	1	5
mmu-miR-145	Crtc1	1	1	1	1	0	0	1	5
mmu-miR-145	Zw10	1	1	0	1	0	1	1	5
mmu-miR-145	Gjb2	1	1	1	1	0	0	1	5
mmu-miR-145	Tfam	1	1	1	1	0	0	1	5
mmu-miR-145	Stam	1	1	1	1	0	0	1	5
mmu-miR-145	Kcnk6	1	1	1	1	0	0	1	5
mmu-miR-145	Plce1	1	1	1	1	0	0	1	5
mmu-miR-145	Tbc1d12	1	1	0	1	0	1	1	5
mmu-miR-145	Phf21b	1	1	0	1	0	1	1	5
mmu-miR-145	Ddc	1	1	1	1	0	0	1	5
mmu-miR-145	Grb10	1	1	1	1	0	0	1	5
mmu-miR-145	Gcs1	1	1	1	1	0	0	1	5
mmu-miR-145	Phldb2	1	1	0	1	0	1	1	5
mmu-miR-145	Rtkn	1	1	1	1	0	1	0	5
mmu-miR-145	Vps54	1	1	0	1	0	1	1	5
mmu-miR-145	B3gnt2	1	1	0	1	0	1	1	5
mmu-miR-145	Hspa1l	1	1	0	1	0	1	1	5
mmu-miR-145	Pacs2	1	1	1	1	0	0	1	5
mmu-miR-145	Pax3	1	1	0	1	0	1	1	5
mmu-miR-145	Abce1	1	1	1	1	0	0	1	5
mmu-miR-145	Irs1	0	1	1	1	0	1	1	5
mmu-miR-145	Pi4k2b	1	1	1	1	0	0	1	5
mmu-miR-145	Pop4	1	1	1	1	0	0	1	5
mmu-miR-145	Snx27	1	1	1	1	0	0	1	5
mmu-miR-145	Dnajb1	1	1	0	1	0	1	1	5
mmu-miR-145	Adpgk	1	1	1	1	0	0	1	5
mmu-miR-145	Abca1	1	1	1	1	0	0	1	5
mmu-miR-145	Polr3g	1	1	1	1	0	0	1	5
mmu-miR-145	Fndc3a	1	1	1	1	0	0	1	5
mmu-miR-145	Ikbkap	1	1	0	1	0	1	1	5
mmu-miR-145	Itga11	1	1	0	1	0	1	1	5
mmu-miR-145	Kcnt1	1	1	1	1	0	0	1	5
mmu-miR-145	Spats2	1	1	1	1	0	0	1	5
mmu-miR-145	Smad3	1	1	1	1	0	0	1	5
mmu-miR-145	Homer1	1	1	1	1	0	0	1	5
mmu-miR-145	Arsb	1	1	1	1	0	1	0	5
mmu-miR-145	Kbtbd7	1	1	1	1	0	0	1	5
mmu-miR-145	Ccng1	1	1	1	1	0	0	1	5
mmu-miR-145	Gabrg2	0	1	1	1	0	1	1	5
mmu-miR-145	Rbpms2	1	1	1	1	0	0	1	5
mmu-miR-145	Ntf5	1	1	1	1	0	0	1	5
mmu-miR-145	Acvr1b	1	1	1	1	0	0	1	5
mmu-miR-145	Ablim1	1	1	1	1	0	0	1	5
mmu-miR-145	Pappa	1	1	1	1	0	0	1	5
mmu-miR-145	Cpne2	1	1	0	1	0	1	1	5
mmu-miR-145	Csn2	1	1	1	1	0	0	1	5
mmu-miR-145	Gas2	1	1	1	1	0	0	1	5
mmu-miR-145	Luzp2	1	1	1	1	0	0	1	5
mmu-miR-145	Mki67ip	1	1	1	1	0	0	1	5
mmu-miR-145	Nuak1	1	1	1	1	0	0	1	5
mmu-miR-145	Slc5a7	1	1	1	1	0	0	1	5
mmu-miR-145	Cbfb	1	1	1	1	0	0	1	5
mmu-miR-145	Uso1	1	1	0	1	0	1	1	5
mmu-miR-145	Ptplad2	1	1	1	1	0	0	1	5
mmu-miR-145	Tmem30a	1	1	1	1	0	0	1	5
mmu-miR-145	Rps6ka6	1	1	0	1	0	1	1	5
mmu-miR-145	Pfkfb2	1	1	1	1	0	0	1	5
mmu-miR-145	Slc22a4	1	1	0	1	0	1	1	5
mmu-miR-145	Celsr2	1	1	1	1	0	0	1	5
mmu-miR-145	Fnip1	1	1	1	1	0	0	1	5
mmu-miR-145	Tnfsf9	1	1	1	1	0	0	1	5
mmu-miR-145	Fgf5	1	1	1	1	0	0	1	5
mmu-miR-145	Tmem35	1	1	0	1	0	1	1	5
mmu-miR-145	Zc3h11a	1	1	1	1	0	0	1	5
mmu-miR-145	Cpeb1	1	1	1	1	0	0	1	5
mmu-miR-145	AC122807.3	1	1	0	1	0	1	1	5
mmu-miR-145	Emilin2	1	1	1	1	0	0	1	5
mmu-miR-145	Barhl2	1	1	0	1	0	1	1	5
mmu-miR-145	Rab14	1	1	1	1	0	0	1	5
mmu-miR-145	Nck1	1	1	0	1	0	1	1	5
mmu-miR-145	Gabarapl2	1	1	1	1	0	0	1	5
mmu-miR-145	Rab30	1	1	1	1	0	0	1	5
mmu-miR-145	Ssbp3	1	1	0	1	0	1	1	5
mmu-miR-145	Nudt7	1	1	1	1	0	0	1	5
mmu-miR-145	Acsl4	1	1	1	1	0	0	1	5
mmu-miR-145	Topbp1	1	1	0	1	0	1	1	5
mmu-miR-145	Tmem178	1	1	1	1	0	0	1	5
mmu-miR-145	Ivns1abp	1	0	1	1	0	1	1	5
mmu-miR-145	Cisd2	1	1	1	1	0	0	1	5
mmu-miR-145	Ube2d3	1	1	1	1	0	0	1	5
mmu-miR-145	Srgap1	1	1	1	1	0	0	1	5
mmu-miR-145	Kif5c	1	1	1	1	0	0	1	5
mmu-miR-145	Rad54l2	1	1	0	1	0	1	1	5
mmu-miR-145	Adcyap1	1	1	1	1	0	0	1	5
mmu-miR-145	Fmnl2	1	1	0	1	0	1	1	5
mmu-miR-145	Cdk10	1	1	0	1	0	1	1	5
mmu-miR-145	Unc119b	1	1	1	1	0	0	1	5
mmu-miR-145	Pomgnt1	1	1	0	1	0	1	1	5
mmu-miR-145	Ergic2	1	1	1	1	0	0	1	5
mmu-miR-145	Uap1	1	1	1	1	0	0	1	5
mmu-miR-145	Efnb3	1	1	0	1	0	1	1	5
mmu-miR-145	Elovl1	1	1	0	1	0	1	1	5
mmu-miR-145	Klhl18	1	1	1	1	0	0	1	5
mmu-miR-145	Itln1	1	1	1	1	0	0	1	5
mmu-miR-145	Mfsd2	0	1	1	1	0	1	1	5
mmu-miR-145	Tgfbr2	1	1	1	1	0	0	1	5
mmu-miR-145	6330503K22Rik	1	1	1	1	0	0	1	5
mmu-miR-145	Exo1	1	1	1	1	0	0	1	5
mmu-miR-145	Slc25a11	1	1	1	1	0	1	0	5
mmu-miR-145	Cog7	1	1	1	1	0	1	0	5
mmu-miR-145	Acbd3	1	1	1	1	0	0	1	5
mmu-miR-145	Derl2	1	1	1	1	0	0	1	5
mmu-miR-145	Thrap3	1	1	0	1	0	1	1	5
mmu-miR-145	Limd1	1	1	1	1	0	0	1	5
mmu-miR-145	Gmeb1	1	1	1	1	0	1	0	5
mmu-miR-145	Serpine1	1	1	1	1	0	0	1	5
mmu-miR-145	Ebf3	1	1	1	1	0	0	1	5
mmu-miR-145	Myo1d	1	1	0	1	0	1	1	5
mmu-miR-145	Ldlrad3	1	1	1	1	0	0	1	5
mmu-miR-145	Actb	1	1	1	1	0	0	1	5
mmu-miR-145	Fscn1	1	1	1	1	0	0	1	5
mmu-miR-145	Igf2	1	1	1	1	0	0	1	5
mmu-miR-145	Ap2b1	1	1	1	1	0	0	1	5
mmu-miR-145	Caprin1	1	1	1	1	0	0	1	5
mmu-miR-145	Ap1gbp1	1	1	0	1	0	1	1	5
mmu-miR-145	Capzb	1	1	1	1	0	0	1	5
mmu-miR-145	Ppm1d	1	1	1	1	0	0	1	5
mmu-miR-145	Med13	1	1	1	1	0	0	1	5
mmu-miR-145	Lin7c	1	1	1	1	0	0	1	5
mmu-miR-145	Arhgap11a	1	1	1	1	0	0	1	5
mmu-miR-145	Tom1l1	1	1	1	1	0	0	1	5
mmu-miR-145	Vps39	1	1	1	1	0	0	1	5
mmu-miR-145	Spop	1	1	1	1	0	0	1	5
mmu-miR-145	Nfe2l1	1	1	1	1	0	0	1	5
mmu-miR-145	Cep152	1	1	0	1	0	1	1	5
mmu-miR-145	Casc3	1	1	0	1	0	1	1	5
mmu-miR-145	Ttl	1	1	0	1	0	1	1	5
mmu-miR-145	Prnp	1	1	1	1	0	0	1	5
mmu-miR-145	Ace	1	1	0	1	0	1	1	5
mmu-miR-145	Ccdc47	1	1	0	1	0	1	1	5
mmu-miR-145	Plagl2	1	1	1	1	0	0	1	5
mmu-miR-145	Sox9	1	1	1	1	0	0	1	5
mmu-miR-145	Nfs1	1	1	0	1	0	1	1	5
mmu-miR-145	Itgb4	1	1	1	1	0	0	1	5
mmu-miR-145	Birc5	1	1	1	1	0	0	1	5
mmu-miR-145	Actg1	1	1	1	1	0	0	1	5
mmu-miR-145	Ptpn1	1	1	0	1	0	1	1	5
mmu-miR-145	BC006779	1	1	1	1	0	0	1	5
mmu-miR-145	Map4k4	1	1	1	0	0	1	1	5
mmu-miR-145	Dock9	1	1	1	0	0	1	1	5
mmu-miR-150	Fxr2	1	1	0	1	0	1	1	5
mmu-miR-150	Abhd2	1	1	0	1	0	1	1	5
mmu-miR-150	Pdap1	1	1	0	1	0	1	1	5
mmu-miR-150	Ephb2	1	1	1	1	0	0	1	5
mmu-miR-150	Itga9	1	1	0	1	0	1	1	5
mmu-miR-150	Gripap1	1	1	1	1	0	1	0	5
mmu-miR-150	Hspb2	1	1	0	1	0	1	1	5
mmu-miR-150	Prkcsh	1	1	0	1	0	1	1	5
mmu-miR-150	Sertad2	1	1	1	1	0	0	1	5
mmu-miR-150	Fgf18	1	1	0	1	0	1	1	5
mmu-miR-150	Igf1r	1	1	1	1	0	0	1	5
mmu-miR-150	Jmjd3	1	1	0	1	0	1	1	5
mmu-miR-150	Tmepai	1	1	0	1	0	1	1	5
mmu-miR-150	Scyl2	1	1	0	1	0	1	1	5
mmu-miR-150	Smg6	1	1	0	1	0	1	1	5
mmu-miR-150	Srp68	1	1	0	1	0	1	1	5
mmu-miR-150	Centg1	1	1	0	1	0	1	1	5
mmu-miR-150	AC145168.5	1	1	1	1	0	0	1	5
mmu-miR-150	Cyb561d1	1	1	1	1	0	0	1	5
mmu-miR-150	Fbxw11	1	1	1	1	0	0	1	5
mmu-miR-150	Mkrn1	1	1	0	1	0	1	1	5
mmu-miR-150	Rarg	1	1	0	1	0	1	1	5
mmu-miR-150	AC166102.2	1	1	1	1	0	0	1	5
mmu-miR-150	Xpnpep2	1	1	1	1	0	0	1	5
mmu-miR-150	Stmn4	1	1	0	1	0	1	1	5
mmu-miR-150	Plat	1	1	1	1	0	0	1	5
mmu-miR-150	Rab1	1	1	0	1	0	1	1	5
mmu-miR-150	Mtmft	1	1	0	1	0	1	1	5
mmu-miR-150	Tmem9b	1	1	0	1	0	1	1	5
mmu-miR-150	Pdzd2	1	1	1	1	0	0	1	5
mmu-miR-150	Ehbp1	1	1	0	1	0	1	1	5
mmu-miR-150	Ypel2	1	1	0	1	0	1	1	5
mmu-miR-150	Arih2	1	1	1	1	0	0	1	5
mmu-miR-150	Setd5	1	1	0	1	0	1	1	5
mmu-miR-150	Mcf2l	1	1	0	1	0	1	1	5
mmu-miR-150	Ocrl	1	1	1	1	0	0	1	5
mmu-miR-150	Plp2	1	1	1	1	0	0	1	5
mmu-miR-150	Capza2	1	1	0	1	0	1	1	5
mmu-miR-150	Lrrc19	1	1	1	1	0	0	1	5
mmu-miR-150	Il17rb	1	1	1	1	0	0	1	5
mmu-miR-150	Cish	1	1	1	1	0	0	1	5
mmu-miR-150	Camkv	1	1	0	1	0	1	1	5
mmu-miR-150	Cd226	1	1	1	1	0	0	1	5
mmu-miR-150	Dirc2	1	1	1	1	0	0	1	5
mmu-miR-150	C530043G21Rik	1	1	0	1	0	1	1	5
mmu-miR-150	Ahcyl1	1	1	1	1	0	0	1	5
mmu-miR-150	Phf8	0	1	1	1	0	1	1	5
mmu-miR-150	Ddx47	1	1	0	1	0	1	1	5
mmu-miR-150	Sdad1	1	1	1	1	0	0	1	5
mmu-miR-150	Bbc3	1	1	0	1	0	1	1	5
mmu-miR-150	Smarcc2	1	1	0	1	0	1	1	5
mmu-miR-150	Rag1	1	1	1	1	0	0	1	5
mmu-miR-150	Cacna1d	1	1	1	1	0	0	1	5
mmu-miR-150	1110018G07Rik	1	1	1	1	0	0	1	5
mmu-miR-150	Pdlim1	1	1	1	1	0	0	1	5
mmu-miR-150	Kcnj4	1	1	0	1	0	1	1	5
mmu-miR-150	Grhl2	1	1	0	1	1	0	1	5
mmu-miR-150	Gcn1l1	1	1	0	1	0	1	1	5
mmu-miR-150	Ror2	1	1	0	1	0	1	1	5
mmu-miR-150	Celsr3	1	1	0	1	0	1	1	5
mmu-miR-150	Apc	1	1	1	1	0	0	1	5
mmu-miR-150	Pctk1	1	1	0	1	0	1	1	5
mmu-miR-150	Ssr3	1	1	1	1	0	0	1	5
mmu-miR-150	Barhl1	1	1	1	1	0	0	1	5
mmu-miR-150	Cpsf3l	1	1	0	1	0	1	1	5
mmu-miR-150	Mbd6	1	1	0	1	0	1	1	5
mmu-miR-150	Zdhhc5	1	1	1	1	0	0	1	5
mmu-miR-150	Klhdc3	1	1	0	1	0	1	1	5
mmu-miR-150	Nrbf2	1	1	0	1	0	1	1	5
mmu-miR-150	Dtd1	1	1	0	1	0	1	1	5
mmu-miR-150	Aff4	1	1	1	1	0	0	1	5
mmu-miR-150	6430517E21Rik	1	1	0	1	0	1	1	5
mmu-miR-150	Tnc	1	1	0	1	0	1	1	5
mmu-miR-150	Pak1	1	1	0	1	0	1	1	5
mmu-miR-150	Olig2	1	1	1	1	0	0	1	5
mmu-miR-150	Usp19	1	1	0	1	0	1	1	5
mmu-miR-150	Rnf34	1	1	1	1	0	0	1	5
mmu-miR-150	Tmsb4x	1	1	0	1	0	1	1	5
mmu-miR-150	Gpr88	1	1	1	1	0	0	1	5
mmu-miR-150	Fut9	1	1	1	1	0	0	1	5
mmu-miR-150	Efnb2	1	1	1	1	0	0	1	5
mmu-miR-150	Atp2b1	1	1	0	1	0	1	1	5
mmu-miR-150	Ngrn	1	1	1	1	0	0	1	5
mmu-miR-150	Mib1	1	1	0	1	0	1	1	5
mmu-miR-150	Crebl1	1	1	0	1	0	1	1	5
mmu-miR-150	Ptx3	1	1	0	1	0	1	1	5
mmu-miR-150	Smarcc1	1	1	1	1	0	0	1	5
mmu-miR-150	Clstn3	1	1	0	1	0	1	1	5
mmu-miR-150	Hip1r	1	1	0	1	0	1	1	5
mmu-miR-150	Nell2	1	1	0	1	0	1	1	5
mmu-miR-150	Ccdc101	1	1	0	1	0	1	1	5
mmu-miR-150	Ubfd1	1	1	1	1	0	0	1	5
mmu-miR-150	Hkdc1	1	1	0	1	0	1	1	5
mmu-miR-150	Cc2d1b	1	1	0	1	0	1	1	5
mmu-miR-150	Map3k12	1	1	1	1	0	0	1	5
mmu-miR-150	Gabrd	1	1	0	1	0	1	1	5
mmu-miR-150	Zfp335	1	1	0	1	0	1	1	5
mmu-miR-150	Bnc2	1	1	1	1	0	0	1	5
mmu-miR-150	Hoxc8	1	1	0	1	0	1	1	5
mmu-miR-150	Slc8a1	1	1	1	1	0	0	1	5
mmu-miR-150	Map1lc3a	1	1	0	1	0	1	1	5
mmu-miR-150	Zadh2	1	1	1	1	0	0	1	5
mmu-miR-150	Dym	1	1	0	1	0	1	1	5
mmu-miR-150	Zfand3	1	1	0	1	0	1	1	5
mmu-miR-150	Chrnb2	1	1	1	1	0	0	1	5
mmu-miR-150	Btla	1	1	1	1	0	0	1	5
mmu-miR-150	Thumpd3	1	1	1	1	0	0	1	5
mmu-miR-150	Mtdh	1	1	0	1	0	1	1	5
mmu-miR-150	Hsf5	1	1	1	1	0	0	1	5
mmu-miR-150	Wdr17	1	1	0	1	0	1	1	5
mmu-miR-150	Txlnb	1	1	1	1	0	0	1	5
mmu-miR-150	Tmem55b	1	1	0	1	0	1	1	5
mmu-miR-150	Zbtb2	1	1	0	1	0	1	1	5
mmu-miR-150	Atg9a	1	1	0	1	0	1	1	5
mmu-miR-150	Abcb9	1	1	1	1	0	0	1	5
mmu-miR-150	Lrrk1	1	1	0	1	0	1	1	5
mmu-miR-150	1300010M03Rik	1	1	0	1	0	1	1	5
mmu-miR-150	Actn4	1	1	0	1	0	1	1	5
mmu-miR-150	Xkr7	1	1	1	1	0	0	1	5
mmu-miR-150	Nr2e1	1	1	0	1	0	1	1	5
mmu-miR-150	Cxcr4	1	1	0	1	0	1	1	5
mmu-miR-150	Klc4	1	1	0	1	0	1	1	5
mmu-miR-150	Elovl5	1	1	0	1	0	1	1	5
mmu-miR-150	Erbb2	1	1	0	1	0	1	1	5
mmu-miR-150	Snrpb2	1	1	1	1	0	0	1	5
mmu-miR-150	Nfe2l2	1	1	1	1	0	0	1	5
mmu-miR-150	Nalcn	1	1	1	1	0	0	1	5
mmu-miR-150	Ptpn9	1	1	0	1	0	1	1	5
mmu-miR-150	Esrra	1	1	0	1	0	1	1	5
mmu-miR-150	2810002O09Rik	1	1	1	1	0	0	1	5
mmu-miR-150	Rnf19a	1	1	0	1	0	1	1	5
mmu-miR-150	Fbxo38	1	1	0	1	0	1	1	5
mmu-miR-150	Tmem20	1	1	1	1	0	0	1	5
mmu-miR-150	Sfxn5	1	1	1	1	0	0	1	5
mmu-miR-150	Srf	1	1	1	1	0	0	1	5
mmu-miR-150	Rnf5	1	1	0	1	0	1	1	5
mmu-miR-150	Ctr9	1	1	0	1	0	1	1	5
mmu-miR-150	Zfp711	1	1	1	1	0	0	1	5
mmu-miR-150	Nat10	1	1	0	1	0	1	1	5
mmu-miR-150	Mras	1	1	0	1	0	1	1	5
mmu-miR-150	Pomt1	1	1	0	1	0	1	1	5
mmu-miR-150	Ccnj	1	1	1	1	0	0	1	5
mmu-miR-150	Vamp2	1	1	0	1	0	1	1	5
mmu-miR-150	Frag1	1	1	0	1	0	1	1	5
mmu-miR-150	Rfc2	1	1	0	1	0	1	1	5
mmu-miR-150	Idh1	1	1	0	1	0	1	1	5
mmu-miR-150	Pde1b	1	1	0	1	0	1	1	5
mmu-miR-150	Actr1a	1	1	0	1	0	1	1	5
mmu-miR-150	AC125535.4	1	1	0	1	0	1	1	5
mmu-miR-150	Rp2h	1	1	1	1	0	0	1	5
mmu-miR-150	Ube2e3	1	1	0	1	0	1	1	5
mmu-miR-150	Ptpn4	1	1	1	1	0	1	0	5
mmu-miR-150	Sema4g	1	1	0	1	0	1	1	5
mmu-miR-150	Plxna2	1	1	0	1	0	1	1	5
mmu-miR-150	Slc35b4	1	1	1	1	0	0	1	5
mmu-miR-150	Tnfsf11	1	1	1	1	0	0	1	5
mmu-miR-150	Cep135	1	1	0	1	0	1	1	5
mmu-miR-150	Gys1	1	1	0	1	0	1	1	5
mmu-miR-150	Rab9	1	1	0	1	0	1	1	5
mmu-miR-150	Pa2g4	1	1	0	1	0	1	1	5
mmu-miR-150	Vav2	1	1	0	1	0	1	1	5
mmu-miR-150	Ndufs2	1	1	0	1	0	1	1	5
mmu-miR-150	Nudt12	1	1	1	1	0	0	1	5
mmu-miR-150	Crtac1	1	1	1	1	0	1	0	5
mmu-miR-150	Sp5	1	1	1	1	0	0	1	5
mmu-miR-150	Pck1	1	1	0	1	0	1	1	5
mmu-miR-150	Pftk1	1	1	1	1	0	0	1	5
mmu-miR-150	Kcnip1	1	1	1	1	0	0	1	5
mmu-miR-150	Cbwd1	1	1	0	1	0	1	1	5
mmu-miR-150	Man1a2	1	1	0	1	0	1	1	5
mmu-miR-150	Larp4	1	1	1	1	0	0	1	5
mmu-miR-150	Dhx35	1	1	0	1	0	1	1	5
mmu-miR-150	Notch3	1	1	0	1	0	1	1	5
mmu-miR-150	Myo1b	1	1	1	1	0	0	1	5
mmu-miR-150	Vhlh	1	1	1	1	0	0	1	5
mmu-miR-150	Ptpro	1	1	0	1	0	1	1	5
mmu-miR-150	Ppp2cb	1	1	1	1	0	0	1	5
mmu-miR-150	ORF34	1	1	0	1	0	1	1	5
mmu-miR-150	P4hb	1	1	0	1	0	1	1	5
mmu-miR-150	2310067B10Rik	1	1	0	1	0	1	1	5
mmu-miR-150	Ahctf1	1	1	0	1	0	1	1	5
mmu-miR-150	Ippk	1	1	1	1	0	0	1	5
mmu-miR-150	Brsk1	1	1	0	1	0	1	1	5
mmu-miR-150	Foxd3	1	1	1	1	0	0	1	5
mmu-miR-150	Aff1	1	1	1	1	0	0	1	5
mmu-miR-150	Stx5a	1	1	0	1	0	1	1	5
mmu-miR-150	Ehf	1	1	1	1	0	0	1	5
mmu-miR-150	Fzd4	1	1	0	1	0	1	1	5
mmu-miR-150	Thbs3	1	1	0	1	0	1	1	5
mmu-miR-150	Ncam1	1	1	0	1	0	1	1	5
mmu-miR-150	Nagk	1	1	0	1	0	1	1	5
mmu-miR-150	Gdap2	1	1	0	1	0	1	1	5
mmu-miR-150	Hspb8	1	1	1	1	0	0	1	5
mmu-miR-150	Dync1h1	1	1	0	1	0	1	1	5
mmu-miR-150	4930583H14Rik	1	1	1	1	0	0	1	5
mmu-miR-150	Dpy19l3	1	1	0	1	0	1	1	5
mmu-miR-150	Ftsj3	1	1	0	1	0	1	1	5
mmu-miR-150	Hspa12b	1	1	0	1	0	1	1	5
mmu-miR-150	Rer1	1	1	0	1	0	1	1	5
mmu-miR-150	Sart3	1	1	0	1	0	1	1	5
mmu-miR-150	Wbscr22	1	1	1	1	0	0	1	5
mmu-miR-150	Ddx55	1	1	0	1	0	1	1	5
mmu-miR-150	Lhx2	1	1	0	1	0	1	1	5
mmu-miR-150	Pvrl2	1	1	1	1	0	0	1	5
mmu-miR-150	Ryk	1	1	0	1	0	1	1	5
mmu-miR-150	Gdi1	1	1	0	1	0	1	1	5
mmu-miR-150	Dctn2	1	1	0	1	0	1	1	5
mmu-miR-150	BC067047	1	1	0	1	0	1	1	5
mmu-miR-150	1300001I01Rik	1	1	0	1	0	1	1	5
mmu-miR-150	2900046G09Rik	1	1	0	1	0	1	1	5
mmu-miR-150	Freq	1	1	1	1	0	0	1	5
mmu-miR-15a	Crem	1	1	0	1	0	1	1	5
mmu-miR-15a	Pcp4	1	1	1	1	1	0	0	5
mmu-miR-15a	Kif5b	1	1	0	1	0	1	1	5
mmu-miR-15a	Wac	1	1	0	1	0	1	1	5
mmu-miR-15a	Ddx1	1	1	0	1	0	1	1	5
mmu-miR-15a	Riok3	1	1	0	1	0	1	1	5
mmu-miR-15a	Pdia6	1	1	1	1	0	0	1	5
mmu-miR-15a	Rad9	1	1	1	1	0	0	1	5
mmu-miR-15a	Gtpbp4	1	1	0	1	0	1	1	5
mmu-miR-15a	Cadps	1	1	0	1	0	1	1	5
mmu-miR-15a	Spnb3	1	1	1	1	0	1	0	5
mmu-miR-15a	Rnf138	1	1	1	1	0	0	1	5
mmu-miR-15a	Zfp622	1	1	1	1	0	0	1	5
mmu-miR-15a	Peli3	1	1	0	1	0	1	1	5
mmu-miR-15a	Akap12	1	1	1	1	0	0	1	5
mmu-miR-15a	Mthfd1l	1	1	0	1	0	1	1	5
mmu-miR-15a	Zfhx4	1	1	1	1	0	0	1	5
mmu-miR-15a	Tac1	1	1	0	1	0	1	1	5
mmu-miR-15a	Ppp3cb	1	1	0	1	0	1	1	5
mmu-miR-15a	Hbp1	1	1	0	1	0	1	1	5
mmu-miR-15a	Cspp1	1	1	0	1	0	1	1	5
mmu-miR-15a	Stard3nl	1	1	0	1	0	1	1	5
mmu-miR-15a	Tram1	1	1	0	1	0	1	1	5
mmu-miR-15a	Chordc1	1	1	1	1	0	0	1	5
mmu-miR-15a	Ccdc28a	1	1	0	1	0	1	1	5
mmu-miR-15a	Polr3a	1	1	1	1	0	0	1	5
mmu-miR-15a	AC121108.12	1	1	1	1	0	0	1	5
mmu-miR-15a	Lrrn3	1	1	0	1	1	0	1	5
mmu-miR-15a	1110058L19Rik	1	1	1	1	0	0	1	5
mmu-miR-15a	Sec62	1	1	1	1	0	0	1	5
mmu-miR-15a	Sgk1	1	1	1	1	0	0	1	5
mmu-miR-15a	5830415L20Rik	1	1	1	1	0	0	1	5
mmu-miR-15a	Zhx1	1	1	1	1	0	0	1	5
mmu-miR-15a	Tbc1d24	1	1	1	1	0	0	1	5
mmu-miR-15a	Otub1	1	1	0	1	0	1	1	5
mmu-miR-15a	Ptprk	1	1	1	1	0	0	1	5
mmu-miR-15a	Podxl	1	1	1	1	0	0	1	5
mmu-miR-15a	Grm3	1	1	0	1	0	1	1	5
mmu-miR-15a	Dynlt3	1	1	1	1	0	0	1	5
mmu-miR-15a	Hddc2	1	1	0	1	0	1	1	5
mmu-miR-15a	Tacc1	1	1	1	1	0	0	1	5
mmu-miR-15a	Grlf1	1	1	1	1	0	0	1	5
mmu-miR-15a	Hagh	1	1	0	1	0	1	1	5
mmu-miR-15a	Hgf	1	1	1	1	0	0	1	5
mmu-miR-15a	Ppm1a	1	1	0	1	1	1	0	5
mmu-miR-15a	Slc7a11	1	1	1	1	0	0	1	5
mmu-miR-15a	Fnta	1	1	0	1	0	1	1	5
mmu-miR-15a	Glud1	1	1	1	1	0	1	0	5
mmu-miR-15a	Parl	1	1	0	1	0	1	1	5
mmu-miR-15a	Sncg	1	1	1	1	0	0	1	5
mmu-miR-15a	Bmpr1a	1	1	0	1	1	0	1	5
mmu-miR-15a	Erlin2	1	1	1	1	0	0	1	5
mmu-miR-15a	Eif2b5	1	1	0	1	0	1	1	5
mmu-miR-15a	Cask	1	1	1	1	1	0	0	5
mmu-miR-15a	Tsta3	1	1	0	1	0	1	1	5
mmu-miR-15a	Nrn1	1	1	1	1	0	0	1	5
mmu-miR-15a	Tpp2	1	1	0	1	0	1	1	5
mmu-miR-15a	Dclk1	1	1	1	1	0	0	1	5
mmu-miR-15a	Ssr1	1	1	1	1	0	0	1	5
mmu-miR-15a	Isoc1	1	1	0	1	0	1	1	5
mmu-miR-15a	Muted	1	1	1	1	0	0	1	5
mmu-miR-15a	Tmem41a	1	1	1	1	0	0	1	5
mmu-miR-15a	Wdr22	1	1	1	1	0	0	1	5
mmu-miR-15a	Sobp	1	1	0	1	0	1	1	5
mmu-miR-15a	Slc39a10	1	1	1	1	0	0	1	5
mmu-miR-15a	Slc7a2	1	1	1	1	0	0	1	5
mmu-miR-15a	Prkag2	1	1	0	1	0	1	1	5
mmu-miR-15a	Gmpr	1	1	0	1	0	1	1	5
mmu-miR-15a	Xrcc2	1	1	1	1	0	0	1	5
mmu-miR-15a	Hmga1	1	1	1	1	0	0	1	5
mmu-miR-15a	Kcnn4	1	1	1	1	0	0	1	5
mmu-miR-15a	Htr4	1	1	1	1	0	0	1	5
mmu-miR-15a	Rbm9	1	1	0	1	0	1	1	5
mmu-miR-15a	Rnf144b	1	1	1	1	0	0	1	5
mmu-miR-15a	Ttpa	1	1	1	1	0	0	1	5
mmu-miR-15a	Tep1	1	1	1	1	0	0	1	5
mmu-miR-15a	Abcd4	1	1	0	1	0	1	1	5
mmu-miR-15a	Gcc2	1	1	1	1	0	0	1	5
mmu-miR-15a	Lrrc15	1	1	1	1	0	0	1	5
mmu-miR-15a	Stox2	1	1	1	1	0	0	1	5
mmu-miR-15a	Lsg1	1	1	0	1	0	1	1	5
mmu-miR-15a	P4ha1	1	1	0	1	0	1	1	5
mmu-miR-15a	6430550H21Rik	1	1	1	1	0	0	1	5
mmu-miR-15a	Supt16h	1	1	0	1	0	1	1	5
mmu-miR-15a	Hoxa3	1	1	0	1	1	0	1	5
mmu-miR-15a	Dmc1	1	1	0	1	0	1	1	5
mmu-miR-15a	Mobkl2b	1	1	1	1	0	0	1	5
mmu-miR-15a	Rab4b	1	1	0	1	0	1	1	5
mmu-miR-15a	Nrbp1	1	1	0	1	0	1	1	5
mmu-miR-15a	Rcl1	1	1	0	1	0	1	1	5
mmu-miR-15a	Jak2	1	1	0	1	0	1	1	5
mmu-miR-15a	B4galt1	1	1	1	1	0	0	1	5
mmu-miR-15a	Pknox1	1	1	0	1	0	1	1	5
mmu-miR-15a	Pld3	1	1	0	1	0	1	1	5
mmu-miR-15a	Snf1lk	1	1	0	1	1	0	1	5
mmu-miR-15a	Smad2	1	1	0	1	0	1	1	5
mmu-miR-15a	Il10ra	1	1	1	1	0	0	1	5
mmu-miR-15a	Herc3	1	1	0	1	0	1	1	5
mmu-miR-15a	B4galt7	1	1	1	1	0	0	1	5
mmu-miR-15a	Kpna1	1	1	0	1	1	0	1	5
mmu-miR-15a	Bace1	1	1	1	1	0	0	1	5
mmu-miR-15a	Ywhah	1	1	1	1	0	1	0	5
mmu-miR-15a	Rpia	1	1	0	1	0	1	1	5
mmu-miR-15a	Sall3	1	1	0	1	1	0	1	5
mmu-miR-15a	Otub2	1	1	1	1	0	0	1	5
mmu-miR-15a	Btaf1	1	1	0	1	0	1	1	5
mmu-miR-15a	C1ql3	1	1	1	1	0	0	1	5
mmu-miR-15a	Zcchc6	1	1	0	1	0	1	1	5
mmu-miR-15a	Tmem150	1	1	0	1	0	1	1	5
mmu-miR-15a	Hus1	1	1	1	1	0	0	1	5
mmu-miR-15a	Ash1l	1	1	1	1	0	0	1	5
mmu-miR-15a	Fbp2	1	1	0	1	0	1	1	5
mmu-miR-15a	Nup50	1	1	1	1	0	0	1	5
mmu-miR-15a	Nebl	1	1	1	1	0	0	1	5
mmu-miR-15a	Cdc14b	1	1	1	1	0	0	1	5
mmu-miR-15a	Gcet2	1	1	1	1	0	0	1	5
mmu-miR-15a	Reck	1	1	1	1	1	0	0	5
mmu-miR-15a	Actr2	1	1	1	1	0	0	1	5
mmu-miR-15a	Mms19	1	1	0	1	0	1	1	5
mmu-miR-15a	Zbtb5	1	1	1	1	0	0	1	5
mmu-miR-15a	Ubtd1	1	1	0	1	0	1	1	5
mmu-miR-15a	Zfp518b	1	1	1	1	0	0	1	5
mmu-miR-15a	Emx1	1	1	0	1	0	1	1	5
mmu-miR-15a	Entpd7	1	1	1	1	0	0	1	5
mmu-miR-15a	Cdca4	1	1	1	1	0	0	1	5
mmu-miR-15a	Pou4f2	1	1	1	1	0	0	1	5
mmu-miR-15a	Pex13	1	1	1	1	0	0	1	5
mmu-miR-15a	Med28	1	1	1	1	0	0	1	5
mmu-miR-15a	Pepd	1	1	0	1	0	1	1	5
mmu-miR-15a	Lingo4	1	1	1	1	0	0	1	5
mmu-miR-15a	Mff	1	1	0	1	0	1	1	5
mmu-miR-15a	Scoc	1	1	1	1	0	0	1	5
mmu-miR-15a	Pi4kb	1	1	0	1	0	1	1	5
mmu-miR-15a	Prkaca	1	1	0	1	0	1	1	5
mmu-miR-15a	Brunol6	1	1	0	1	0	1	1	5
mmu-miR-15a	Xpo7	1	1	1	1	0	0	1	5
mmu-miR-15a	Rfx1	1	1	0	1	0	1	1	5
mmu-miR-15a	Mllt11	1	1	1	1	0	0	1	5
mmu-miR-15a	Rfc1	1	1	1	1	0	0	1	5
mmu-miR-15a	Sucla2	1	1	0	1	0	1	1	5
mmu-miR-15a	Mpp1	1	1	1	1	0	0	1	5
mmu-miR-15a	Kcnh3	1	1	0	1	0	1	1	5
mmu-miR-15a	Tmem33	1	1	1	1	0	0	1	5
mmu-miR-15a	Lrig1	1	1	0	1	1	0	1	5
mmu-miR-15a	Kctd8	0	1	1	1	1	0	1	5
mmu-miR-15a	Map2k1	1	1	0	1	0	1	1	5
mmu-miR-15a	1500041N16Rik	1	1	0	1	0	1	1	5
mmu-miR-15a	2010203O07Rik	1	1	0	1	0	1	1	5
mmu-miR-15a	Mxi1	1	1	0	1	0	1	1	5
mmu-miR-15a	Crisp2	1	1	1	1	0	0	1	5
mmu-miR-15a	Map3k7ip3	1	1	1	1	0	0	1	5
mmu-miR-15a	Odz2	1	1	1	1	0	0	1	5
mmu-miR-15a	Dnaja2	1	1	0	1	0	1	1	5
mmu-miR-15a	Phkb	1	1	0	1	0	1	1	5
mmu-miR-15a	Siah1a	1	1	1	1	0	1	0	5
mmu-miR-15a	Dcun1d4	1	1	1	1	0	0	1	5
mmu-miR-15a	Gfm2	1	1	1	1	0	0	1	5
mmu-miR-15a	Sgcb	1	1	1	1	0	0	1	5
mmu-miR-15a	Espnl	1	1	1	1	0	0	1	5
mmu-miR-15a	Slc4a8	1	1	1	1	0	0	1	5
mmu-miR-15a	Btf3	1	1	0	1	0	1	1	5
mmu-miR-15a	Sall1	1	0	1	1	0	1	1	5
mmu-miR-15a	Chd9	1	1	0	1	1	0	1	5
mmu-miR-15a	Tjap1	1	1	0	1	0	1	1	5
mmu-miR-15a	Mterfd2	1	1	1	1	0	0	1	5
mmu-miR-15a	Mmp2	1	1	0	1	0	1	1	5
mmu-miR-15a	Med27	1	1	0	1	0	1	1	5
mmu-miR-15a	Gcnt3	1	1	1	1	0	0	1	5
mmu-miR-15a	Pik3r1	1	1	1	1	0	0	1	5
mmu-miR-15a	Rnf111	1	1	1	1	0	0	1	5
mmu-miR-15a	Csde1	1	1	1	1	0	0	1	5
mmu-miR-15a	Ogt	1	1	1	1	0	0	1	5
mmu-miR-15a	Bcl2	1	1	0	1	1	0	1	5
mmu-miR-15a	Zer1	1	1	0	1	0	1	1	5
mmu-miR-15a	Dolpp1	1	1	1	1	0	0	1	5
mmu-miR-15a	Kat2b	1	1	0	1	0	1	1	5
mmu-miR-15a	Tk2	1	1	1	1	0	0	1	5
mmu-miR-15a	Scg3	1	1	0	1	0	1	1	5
mmu-miR-15a	Atp7a	1	1	1	1	0	0	1	5
mmu-miR-15a	Btbd11	1	1	0	1	0	1	1	5
mmu-miR-15a	Cdkl3	1	1	0	1	0	1	1	5
mmu-miR-15a	Kcnc4	1	1	1	1	0	0	1	5
mmu-miR-15a	Ccnt2	1	1	1	1	0	0	1	5
mmu-miR-15a	Dpp9	1	1	0	1	0	1	1	5
mmu-miR-15a	Tbx22	1	1	1	1	0	0	1	5
mmu-miR-15a	Tppp3	1	1	0	1	0	1	1	5
mmu-miR-15a	Mtap	1	1	1	1	0	0	1	5
mmu-miR-15a	Rfx2	1	1	0	1	0	1	1	5
mmu-miR-15a	Wdr47	1	1	0	1	0	1	1	5
mmu-miR-15a	Phip	1	1	1	1	0	0	1	5
mmu-miR-15a	Rassf5	1	1	0	1	1	0	1	5
mmu-miR-15a	Ibtk	1	1	0	1	0	1	1	5
mmu-miR-15a	Nfatc3	1	1	1	1	0	0	1	5
mmu-miR-15a	Rasgef1b	1	1	1	1	0	0	1	5
mmu-miR-15a	Nuak2	1	1	1	1	0	0	1	5
mmu-miR-15a	Mlf2	1	1	0	1	0	1	1	5
mmu-miR-15a	Zfp592	1	1	1	1	0	1	0	5
mmu-miR-15a	Btg2	1	1	1	1	0	0	1	5
mmu-miR-15a	Slc28a1	1	1	1	1	0	0	1	5
mmu-miR-15a	Pgm2	1	1	1	1	0	1	0	5
mmu-miR-15a	Klhl8	1	1	0	1	0	1	1	5
mmu-miR-15a	Tmem183a	1	1	1	1	0	0	1	5
mmu-miR-15a	2400003C14Rik	1	1	1	1	0	1	0	5
mmu-miR-15a	Myom1	1	1	0	1	0	1	1	5
mmu-miR-15a	Mesdc2	1	1	1	1	0	0	1	5
mmu-miR-15a	Mapkap1	1	1	1	1	0	0	1	5
mmu-miR-15a	Ccnd2	1	1	0	1	1	0	1	5
mmu-miR-15a	Zfp326	1	1	1	1	0	1	0	5
mmu-miR-15a	Sgip1	1	1	0	1	0	1	1	5
mmu-miR-15a	Tgfbr3	1	1	1	1	0	0	1	5
mmu-miR-15a	Nr5a2	1	1	0	1	0	1	1	5
mmu-miR-15a	Wdr59	1	1	0	1	0	1	1	5
mmu-miR-15a	Ptprr	1	1	0	1	0	1	1	5
mmu-miR-15a	Gak	1	1	0	1	0	1	1	5
mmu-miR-15a	Aqp11	1	1	1	1	0	0	1	5
mmu-miR-15a	Sec24b	1	1	0	1	0	1	1	5
mmu-miR-15a	Capn6	1	1	1	1	0	1	0	5
mmu-miR-15a	Crebl2	1	1	1	1	0	0	1	5
mmu-miR-15a	Hmga2	1	1	0	1	1	0	1	5
mmu-miR-15a	1700025G04Rik	1	1	1	1	1	0	0	5
mmu-miR-15a	Nfkb1	1	1	0	1	0	1	1	5
mmu-miR-15a	Mapkapk3	1	1	1	1	0	0	1	5
mmu-miR-15a	Adh5	1	1	0	1	0	1	1	5
mmu-miR-15a	Metap1	1	1	0	1	0	1	1	5
mmu-miR-15a	Tspan5	1	1	0	1	1	0	1	5
mmu-miR-15a	Coro1c	1	1	0	1	0	1	1	5
mmu-miR-15a	Cbfa2t3	1	1	0	1	0	1	1	5
mmu-miR-15a	Cmpk1	1	1	0	1	0	1	1	5
mmu-miR-15a	Rbm6	1	0	1	1	1	0	1	5
mmu-miR-15a	Sox5	1	1	0	1	1	0	1	5
mmu-miR-15a	Stim1	1	1	0	1	0	1	1	5
mmu-miR-15a	Mknk1	1	1	1	1	0	0	1	5
mmu-miR-15a	Zbtb39	1	1	1	1	0	0	1	5
mmu-miR-15a	Prkar2a	1	1	1	1	0	0	1	5
mmu-miR-15a	Uqcrc1	1	1	0	1	0	1	1	5
mmu-miR-15a	Acadm	1	1	0	1	0	1	1	5
mmu-miR-15a	Siah1b	1	1	0	1	1	1	0	5
mmu-miR-15a	Cdc25a	1	1	1	1	0	0	1	5
mmu-miR-15a	Lrp2	1	1	1	1	0	0	1	5
mmu-miR-15a	Wee1	1	1	1	1	1	0	0	5
mmu-miR-15a	Ybx1	1	1	1	1	0	1	0	5
mmu-miR-15a	Gorasp2	1	1	0	1	0	1	1	5
mmu-miR-15a	Erp29	1	1	1	1	0	0	1	5
mmu-miR-15a	Pth	1	1	1	1	0	0	1	5
mmu-miR-15a	Ppt1	1	1	1	1	0	0	1	5
mmu-miR-15a	Ppie	1	1	0	1	0	1	1	5
mmu-miR-15a	Hpcal4	1	1	1	1	0	0	1	5
mmu-miR-15a	Axud1	1	1	1	1	0	0	1	5
mmu-miR-15a	Spag7	1	1	0	1	0	1	1	5
mmu-miR-15a	Gga2	1	1	1	1	0	0	1	5
mmu-miR-15a	Trak1	1	1	0	1	0	1	1	5
mmu-miR-15a	Snrk	1	1	0	1	1	0	1	5
mmu-miR-15a	Eif2c4	1	1	0	1	1	0	1	5
mmu-miR-15a	Mapk3	1	1	0	1	0	1	1	5
mmu-miR-15a	Dtl	1	1	1	1	0	0	1	5
mmu-miR-15a	Pafah1b1	1	1	1	1	0	0	1	5
mmu-miR-15a	Phkg2	1	1	0	1	0	1	1	5
mmu-miR-15a	Rnf40	1	1	0	1	0	1	1	5
mmu-miR-15a	Ssrp1	1	1	0	1	0	1	1	5
mmu-miR-15a	Bckdk	1	1	0	1	0	1	1	5
mmu-miR-15a	Ankrd13b	1	1	0	1	0	1	1	5
mmu-miR-15a	Pwwp2b	1	1	1	1	0	0	1	5
mmu-miR-15a	Mepce	1	1	0	1	0	1	1	5
mmu-miR-15a	Syf2	1	1	0	1	0	1	1	5
mmu-miR-15a	Psmd13	1	1	0	1	0	1	1	5
mmu-miR-15a	Nf1	1	1	1	1	0	0	1	5
mmu-miR-15a	Omg	1	1	0	1	1	1	0	5
mmu-miR-15a	Slc25a22	1	1	1	1	0	0	1	5
mmu-miR-15a	Zfp46	1	1	1	1	0	0	1	5
mmu-miR-15a	Luzp1	1	1	1	1	0	0	1	5
mmu-miR-15a	Gna12	1	1	1	1	0	0	1	5
mmu-miR-15a	Brsk2	1	1	0	1	0	1	1	5
mmu-miR-15a	Wipi2	1	1	1	1	0	0	1	5
mmu-miR-15a	Abtb2	1	1	1	1	0	0	1	5
mmu-miR-15a	Taf15	1	1	0	1	0	1	1	5
mmu-miR-15a	Smurf1	1	1	0	1	1	0	1	5
mmu-miR-15a	Ccnd1	1	1	0	1	1	0	1	5
mmu-miR-15a	Fshb	1	1	1	1	0	0	1	5
mmu-miR-15a	Cdx2	1	1	1	1	0	0	1	5
mmu-miR-15a	Spen	1	1	0	1	0	1	1	5
mmu-miR-15a	Slc12a6	1	1	1	1	0	0	1	5
mmu-miR-15a	Dnajc16	1	1	1	1	0	0	1	5
mmu-miR-15a	Kl	1	1	1	1	0	0	1	5
mmu-miR-15a	Mfn2	1	1	1	1	0	0	1	5
mmu-miR-15a	Dll4	1	1	0	1	1	0	1	5
mmu-miR-15a	Kif1b	1	1	1	1	0	0	1	5
mmu-miR-15a	Espn	1	1	0	1	0	1	1	5
mmu-miR-15a	Atad4	1	1	1	1	0	0	1	5
mmu-miR-15a	Pldn	1	1	1	1	0	0	1	5
mmu-miR-15a	Fgf7	1	1	0	1	1	0	1	5
mmu-miR-15a	Usp8	1	1	0	1	0	1	1	5
mmu-miR-15a	Cntnap1	1	1	1	1	0	0	1	5
mmu-miR-15a	Vat1	1	1	1	1	0	0	1	5
mmu-miR-15a	Btbd3	1	1	1	1	0	0	1	5
mmu-miR-15a	Polr3f	1	1	1	1	0	0	1	5
mmu-miR-15a	Slc24a3	1	1	0	1	1	0	1	5
mmu-miR-15a	Cdc27	1	1	1	1	0	0	1	5
mmu-miR-15a	Nanp	1	1	1	1	0	0	1	5
mmu-miR-15a	Wdr68	1	1	1	1	0	0	1	5
mmu-miR-15a	Mapre1	1	1	0	1	0	1	1	5
mmu-miR-15a	Axin2	1	1	0	1	0	1	1	5
mmu-miR-15a	Zfp341	1	1	0	1	0	1	1	5
mmu-miR-15a	Tgif2	1	1	1	1	0	0	1	5
mmu-miR-15a	Gga3	1	1	1	1	0	0	1	5
mmu-miR-15a	Acox1	1	1	1	1	0	0	1	5
mmu-miR-15a	Serinc3	1	1	1	1	0	0	1	5
mmu-miR-15a	Zswim3	1	1	1	1	0	0	1	5
mmu-miR-15a	Vapb	1	1	1	1	0	0	1	5
mmu-miR-15a	Ythdf1	1	1	0	1	0	1	1	5
mmu-miR-15a	Iars	1	1	1	0	0	1	1	5
mmu-miR-15a	Med26	1	1	1	0	0	1	1	5
mmu-miR-15a	Cops7b	1	1	1	0	0	1	1	5
mmu-miR-15a	C1qtnf2	1	1	1	0	0	1	1	5
mmu-miR-183	Ankrd55	1	1	0	1	0	1	1	5
mmu-miR-183	Slc25a17	1	1	0	1	0	1	1	5
mmu-miR-183	Heatr1	1	1	0	1	0	1	1	5
mmu-miR-183	Rad50	1	1	0	1	0	1	1	5
mmu-miR-183	Dmxl1	1	1	0	1	0	1	1	5
mmu-miR-183	Gpr85	1	1	1	1	0	0	1	5
mmu-miR-183	Anks3	1	1	0	1	0	1	1	5
mmu-miR-183	Sfrs11	1	0	1	1	0	1	1	5
mmu-miR-183	Kcnj14	1	1	1	1	0	0	1	5
mmu-miR-183	Pdzd8	1	1	0	1	0	1	1	5
mmu-miR-183	Map3k7ip2	1	1	0	1	0	1	1	5
mmu-miR-183	Alg5	1	1	1	1	0	1	0	5
mmu-miR-183	Unc13d	1	1	0	1	0	1	1	5
mmu-miR-183	Nfasc	1	1	0	1	0	1	1	5
mmu-miR-183	Cnpy4	1	1	1	1	0	0	1	5
mmu-miR-183	Rab8b	1	1	1	1	0	0	1	5
mmu-miR-183	Ncoa5	1	1	0	1	0	1	1	5
mmu-miR-183	Bcl11b	1	1	0	1	0	1	1	5
mmu-miR-183	Grem2	1	1	1	1	0	0	1	5
mmu-miR-183	Dap	1	1	1	1	0	0	1	5
mmu-miR-183	Nrp2	1	1	1	1	0	0	1	5
mmu-miR-183	Mkln1	1	1	0	1	0	1	1	5
mmu-miR-183	Gja1	1	1	0	1	0	1	1	5
mmu-miR-183	Itgb1	1	1	1	0	0	1	1	5
mmu-miR-183	Stc1	1	1	0	1	0	1	1	5
mmu-miR-183	Spcs2	1	1	0	1	0	1	1	5
mmu-miR-183	Arhgap15	1	1	1	1	0	1	0	5
mmu-miR-183	Hectd2	1	1	1	1	0	0	1	5
mmu-miR-183	Slamf8	1	1	1	1	0	0	1	5
mmu-miR-183	Wdr40a	1	1	0	1	0	1	1	5
mmu-miR-183	Riok1	1	1	0	1	0	1	1	5
mmu-miR-183	Sema3e	1	1	1	1	0	0	1	5
mmu-miR-183	Tgds	1	1	0	1	0	1	1	5
mmu-miR-183	Scyl3	1	1	1	1	0	0	1	5
mmu-miR-183	Vdac1	1	1	1	1	0	0	1	5
mmu-miR-183	Arhgap18	1	1	0	1	0	1	1	5
mmu-miR-183	Arpp19	1	1	1	1	0	0	1	5
mmu-miR-183	Sh3bp4	1	1	0	1	0	1	1	5
mmu-miR-183	Hc	1	1	0	1	0	1	1	5
mmu-miR-183	Uvrag	1	1	0	1	0	1	1	5
mmu-miR-183	Azi2	1	1	1	1	0	0	1	5
mmu-miR-183	Thsd7b	1	1	0	1	0	1	1	5
mmu-miR-183	Tmco1	1	1	1	1	0	0	1	5
mmu-miR-183	Txndc16	1	1	1	1	0	0	1	5
mmu-miR-183	Gpr180	1	1	0	1	0	1	1	5
mmu-miR-183	Dazap2	1	1	0	1	0	1	1	5
mmu-miR-183	Gpr103	1	1	1	1	0	1	0	5
mmu-miR-183	Arid4b	1	1	0	1	1	0	1	5
mmu-miR-183	Bzw1	1	1	0	1	0	1	1	5
mmu-miR-183	Ascc2	1	1	0	1	0	1	1	5
mmu-miR-183	Eif4a2	1	1	0	1	1	0	1	5
mmu-miR-183	Prcp	1	1	0	1	0	1	1	5
mmu-miR-183	Sin3a	1	1	0	1	0	1	1	5
mmu-miR-183	Pex19	1	1	1	1	0	0	1	5
mmu-miR-183	Actn3	1	1	0	1	0	1	1	5
mmu-miR-183	Cherp	1	1	0	1	0	1	1	5
mmu-miR-183	Bmi1	1	1	0	1	1	0	1	5
mmu-miR-183	Pbx4	1	1	0	1	0	1	1	5
mmu-miR-183	AC165281.2	1	1	0	1	0	1	1	5
mmu-miR-183	Il17rd	1	1	1	1	0	0	1	5
mmu-miR-183	Timp3	1	1	1	1	0	0	1	5
mmu-miR-183	Mta1	1	1	1	1	0	0	1	5
mmu-miR-183	Idh2	1	1	1	1	0	0	1	5
mmu-miR-183	Man1a	1	1	1	1	0	0	1	5
mmu-miR-183	Hcfc1	1	1	0	1	0	1	1	5
mmu-miR-183	Cdcp1	1	1	1	1	0	0	1	5
mmu-miR-183	Thoc4	1	1	0	1	0	1	1	5
mmu-miR-183	Ero1lb	1	1	1	1	0	0	1	5
mmu-miR-183	Phf15	1	1	0	1	1	0	1	5
mmu-miR-183	Opn3	1	1	0	1	0	1	1	5
mmu-miR-183	Ankrd13c	1	1	0	1	0	1	1	5
mmu-miR-183	Gng5	1	1	0	1	0	1	1	5
mmu-miR-183	Gcc1	1	1	1	1	0	0	1	5
mmu-miR-183	Bnip2	1	1	0	1	0	1	1	5
mmu-miR-183	Smarcb1	1	1	0	1	0	1	1	5
mmu-miR-183	Cog3	1	1	0	1	0	1	1	5
mmu-miR-183	Ajap1	1	1	1	1	0	0	1	5
mmu-miR-183	Gjd2	1	1	1	1	0	1	0	5
mmu-miR-183	Clcn3	1	1	1	1	0	0	1	5
mmu-miR-183	Itgb8	1	1	1	1	0	0	1	5
mmu-miR-183	Pdgfd	1	1	0	1	0	1	1	5
mmu-miR-183	Mre11a	1	1	0	1	0	1	1	5
mmu-miR-183	Hs3st1	1	1	0	1	0	1	1	5
mmu-miR-183	Arhgef18	1	1	1	1	0	0	1	5
mmu-miR-183	Plekha3	1	1	1	1	0	0	1	5
mmu-miR-183	Slc25a20	1	1	1	1	0	0	1	5
mmu-miR-183	Flrt3	1	1	0	1	1	0	1	5
mmu-miR-183	Pdcd6	1	1	1	1	0	0	1	5
mmu-miR-183	Lhfpl2	1	1	1	1	0	0	1	5
mmu-miR-183	Stx17	1	1	1	1	0	0	1	5
mmu-miR-183	Bnip3l	1	1	1	1	0	0	1	5
mmu-miR-183	Ptdss1	1	1	1	1	0	0	1	5
mmu-miR-183	Prkch	1	1	1	1	0	0	1	5
mmu-miR-183	Epdr1	1	1	1	1	0	0	1	5
mmu-miR-183	Akap7	1	1	1	1	0	0	1	5
mmu-miR-183	Psen2	1	1	1	1	0	0	1	5
mmu-miR-183	Noc3l	1	1	1	1	0	0	1	5
mmu-miR-183	Ccdc50	1	1	1	1	0	0	1	5
mmu-miR-183	Tcf7l2	1	1	0	1	0	1	1	5
mmu-miR-183	Mrpl44	1	1	0	1	0	1	1	5
mmu-miR-183	Lrp6	1	1	1	1	0	0	1	5
mmu-miR-193	Alpl	1	1	0	1	0	1	1	5
mmu-miR-193	Apln	1	1	1	1	0	0	1	5
mmu-miR-193	Stmn1	1	1	1	1	0	0	1	5
mmu-miR-193	Zc3h14	1	1	0	1	0	1	1	5
mmu-miR-193	Ing1	1	1	1	1	0	0	1	5
mmu-miR-193	Ywhaz	1	1	1	1	0	0	1	5
mmu-miR-193	Phc3	1	1	0	1	0	1	1	5
mmu-miR-193	Hoxd13	1	1	1	1	0	0	1	5
mmu-miR-193	Canx	1	1	0	1	0	1	1	5
mmu-miR-193	Rhag	1	1	1	1	0	0	1	5
mmu-miR-193	Pde6d	1	1	0	1	0	1	1	5
mmu-miR-193	En2	1	1	1	1	0	0	1	5
mmu-miR-193	Kif21b	1	1	1	1	0	0	1	5
mmu-miR-193	Gpr173	1	1	1	1	0	1	0	5
mmu-miR-193	Arpc5	1	1	1	1	0	1	0	5
mmu-miR-193	Calcb	1	1	0	1	0	1	1	5
mmu-miR-193	Myl1	1	1	0	1	0	1	1	5
mmu-miR-193	Npepps	1	1	0	1	0	1	1	5
mmu-miR-193	Opa3	1	1	1	1	0	0	1	5
mmu-miR-193	Max	1	1	1	1	0	0	1	5
mmu-miR-193	Fhdc1	1	1	1	1	0	0	1	5
mmu-miR-193	Cib1	1	1	0	1	0	1	1	5
mmu-miR-193	Ppp2r5a	1	1	0	1	0	1	1	5
mmu-miR-193	Galnt7	1	1	0	1	0	1	1	5
mmu-miR-193	Vcpip1	1	1	0	1	0	1	1	5
mmu-miR-193	Greb1	1	1	0	1	0	1	1	5
mmu-miR-193	Cntnap2	1	1	1	1	0	0	1	5
mmu-miR-193	Bmp1	1	1	0	1	0	1	1	5
mmu-miR-193	Magi1	1	1	1	1	0	0	1	5
mmu-miR-193	Gria4	1	1	1	1	0	0	1	5
mmu-miR-193	St6galnac3	1	1	1	1	0	0	1	5
mmu-miR-193	Adar	1	1	0	1	0	1	1	5
mmu-miR-193	Alox5	1	1	0	1	0	1	1	5
mmu-miR-193	Tcta	1	1	1	1	0	0	1	5
mmu-miR-193	Mthfd1	1	1	0	1	0	1	1	5
mmu-miR-193	Pols	1	1	0	1	0	1	1	5
mmu-miR-193	AC135108.3	1	1	1	1	0	0	1	5
mmu-miR-193	Marcksl1	1	1	0	1	0	1	1	5
mmu-miR-193	Col4a6	1	1	1	1	0	0	1	5
mmu-miR-193	Pum1	1	1	0	1	0	1	1	5
mmu-miR-193	Pld1	1	1	0	1	0	1	1	5
mmu-miR-193	Mmp14	1	1	0	1	0	1	1	5
mmu-miR-193	Tmcc2	1	1	0	1	0	1	1	5
mmu-miR-193	Grb7	1	1	1	1	0	0	1	5
mmu-miR-193	Hyou1	1	1	1	1	0	0	1	5
mmu-miR-193	Mycn	1	1	0	1	0	1	1	5
mmu-miR-193	Slc4a3	1	1	0	1	0	1	1	5
mmu-miR-193	Dlg1	1	1	0	1	0	1	1	5
mmu-miR-193	AC171108.2	1	1	0	1	0	1	1	5
mmu-miR-193	Prkg2	1	1	0	1	0	1	1	5
mmu-miR-193	Fat4	1	1	0	1	0	1	1	5
mmu-miR-193	Tal1	1	1	1	1	0	0	1	5
mmu-miR-193	Chrna7	1	1	0	1	0	1	1	5
mmu-miR-193	Sh3gl2	0	1	1	1	0	1	1	5
mmu-miR-193	1110004F10Rik	1	1	1	1	0	1	0	5
mmu-miR-193	9530077C05Rik	1	1	0	1	0	1	1	5
mmu-miR-193	Foxn1	1	1	0	1	0	1	1	5
mmu-miR-193	Slc36a1	1	1	0	1	0	1	1	5
mmu-miR-193	Faim2	1	1	1	1	0	0	1	5
mmu-miR-193	Plau	1	1	1	1	0	0	1	5
mmu-miR-193	Ccdc134	1	1	1	1	0	0	1	5
mmu-miR-193	Gmeb2	1	1	1	1	0	0	1	5
mmu-miR-193	Suclg1	1	1	0	1	0	1	1	5
mmu-miR-193	Jam3	1	1	1	1	0	0	1	5
mmu-miR-193	Zfp91	1	1	0	1	0	1	1	5
mmu-miR-193	Crtc2	1	1	0	1	0	1	1	5
mmu-miR-193	Calb1	1	1	1	1	0	0	1	5
mmu-miR-193	Scube2	1	1	0	1	0	1	1	5
mmu-miR-193	Slc39a5	1	0	1	1	0	1	1	5
mmu-miR-193	Dnajc7	1	1	0	1	0	1	1	5
mmu-miR-193	Mllt6	1	1	0	1	0	1	1	5
mmu-miR-193	Tmem85	1	1	0	1	0	1	1	5
mmu-miR-193	Acpl2	1	1	1	1	0	0	1	5
mmu-miR-193	Tgm4	1	1	1	1	0	0	1	5
mmu-miR-193	Me3	1	1	1	1	0	0	1	5
mmu-miR-193	Etv6	1	1	0	1	1	0	1	5
mmu-miR-193	Gramd4	1	1	1	1	0	0	1	5
mmu-miR-193	Zfp365	1	1	1	1	0	0	1	5
mmu-miR-193	Smc1b	1	1	0	1	0	1	1	5
mmu-miR-200a	Rmnd5a	1	1	0	1	0	1	1	5
mmu-miR-200a	Sltm	1	1	0	1	0	1	1	5
mmu-miR-200a	Tead2	1	1	1	1	0	0	1	5
mmu-miR-200a	AL672234.27	1	1	1	1	0	0	1	5
mmu-miR-200a	Serpini1	1	1	1	1	0	0	1	5
mmu-miR-200a	Stag1	1	1	1	1	0	1	0	5
mmu-miR-200a	C330002I19Rik	1	1	0	1	0	1	1	5
mmu-miR-200a	Asxl2	1	1	1	1	0	0	1	5
mmu-miR-200a	Numbl	1	1	0	1	0	1	1	5
mmu-miR-200a	Slc6a9	1	1	0	1	0	1	1	5
mmu-miR-200a	Ppp4r1l	1	1	0	1	0	1	1	5
mmu-miR-200a	D10Bwg1379e	1	1	1	1	0	1	0	5
mmu-miR-200a	Aldh1a1	1	1	1	1	0	0	1	5
mmu-miR-200a	1110067D22Rik	1	1	1	1	0	0	1	5
mmu-miR-200a	Sfpq	1	1	0	1	0	1	1	5
mmu-miR-200a	1810048J11Rik	1	1	1	1	0	1	0	5
mmu-miR-200a	Kcna2	1	1	0	1	0	1	1	5
mmu-miR-200a	Dapk1	1	1	0	1	0	1	1	5
mmu-miR-200a	Ywhag	1	1	1	1	0	0	1	5
mmu-miR-200a	Tmem68	1	1	0	1	0	1	1	5
mmu-miR-200a	Chd1l	1	1	0	1	0	1	1	5
mmu-miR-200a	Pcgf5	1	1	0	1	0	1	1	5
mmu-miR-200a	Nampt	1	1	0	1	0	1	1	5
mmu-miR-200a	Rnd3	1	1	0	1	0	1	1	5
mmu-miR-200a	Slc41a2	1	1	1	1	0	0	1	5
mmu-miR-200a	Csnk1a1	1	1	0	1	0	1	1	5
mmu-miR-200a	Prmt6	1	1	1	1	0	0	1	5
mmu-miR-200a	Slc6a14	1	1	0	1	0	1	1	5
mmu-miR-200a	Slc33a1	1	1	0	1	0	1	1	5
mmu-miR-200a	Igj	1	1	1	1	0	0	1	5
mmu-miR-20a	Rab10	1	1	1	1	0	0	1	5
mmu-miR-20a	Bambi	1	1	1	1	0	0	1	5
mmu-miR-20a	Trib2	1	1	0	1	0	1	1	5
mmu-miR-20a	Tiam2	1	1	1	1	0	0	1	5
mmu-miR-20a	Wdr37	1	0	1	1	1	0	1	5
mmu-miR-20a	Rrm2	1	1	1	1	0	0	1	5
mmu-miR-20a	Fndc1	1	1	1	1	0	0	1	5
mmu-miR-20a	Nkiras1	1	1	1	1	0	0	1	5
mmu-miR-20a	Tmem123	1	1	1	1	0	0	1	5
mmu-miR-20a	Sema5a	1	1	1	1	0	0	1	5
mmu-miR-20a	Zfp704	1	1	0	1	1	0	1	5
mmu-miR-20a	Sash1	1	1	1	1	0	0	1	5
mmu-miR-20a	Col4a2	1	1	1	1	0	0	1	5
mmu-miR-20a	Chmp4c	1	1	1	1	0	0	1	5
mmu-miR-20a	Smoc2	1	1	1	1	0	0	1	5
mmu-miR-20a	Tmem168	1	1	1	1	0	0	1	5
mmu-miR-20a	Vcl	1	1	0	1	0	1	1	5
mmu-miR-20a	Tes	1	1	1	1	0	0	1	5
mmu-miR-20a	Lilrb3	1	1	1	1	0	0	1	5
mmu-miR-20a	Klf10	1	1	1	1	0	0	1	5
mmu-miR-20a	Pkd2l2	1	1	0	1	0	1	1	5
mmu-miR-20a	Rgmb	1	1	1	1	0	0	1	5
mmu-miR-20a	Nkapl	1	1	1	1	0	0	1	5
mmu-miR-20a	Oxr1	1	1	1	1	0	0	1	5
mmu-miR-20a	Mcm3	1	1	0	1	0	1	1	5
mmu-miR-20a	Fbxo25	1	1	1	1	0	0	1	5
mmu-miR-20a	5730410E15Rik	1	1	1	1	0	0	1	5
mmu-miR-20a	Atg2a	1	1	0	1	0	1	1	5
mmu-miR-20a	Eif5a2	1	1	1	1	0	0	1	5
mmu-miR-20a	Rad21	1	1	0	1	0	1	1	5
mmu-miR-20a	Egln3	1	1	1	1	0	0	1	5
mmu-miR-20a	Zfp800	1	1	1	1	0	0	1	5
mmu-miR-20a	Pcdha10	1	1	1	1	0	0	1	5
mmu-miR-20a	Has2	1	1	1	1	1	0	0	5
mmu-miR-20a	Zhx2	1	1	1	1	0	0	1	5
mmu-miR-20a	Atad2	1	1	1	1	0	0	1	5
mmu-miR-20a	Pcdhb17	1	1	1	1	0	0	1	5
mmu-miR-20a	Tmem65	1	1	1	1	0	0	1	5
mmu-miR-20a	5730596K20Rik	1	1	1	1	0	0	1	5
mmu-miR-20a	Arhgap26	1	1	1	1	0	0	1	5
mmu-miR-20a	Cald1	1	1	0	1	1	0	1	5
mmu-miR-20a	Cnot4	1	1	1	1	0	1	0	5
mmu-miR-20a	Hif1a	1	1	1	1	0	0	1	5
mmu-miR-20a	Hook3	1	0	1	1	0	1	1	5
mmu-miR-20a	Clcn7	1	1	1	1	0	0	1	5
mmu-miR-20a	Abcc5	1	1	0	1	0	1	1	5
mmu-miR-20a	Prr16	1	1	1	1	0	0	1	5
mmu-miR-20a	Napepld	1	1	1	1	0	0	1	5
mmu-miR-20a	Slc22a23	1	1	1	1	1	0	0	5
mmu-miR-20a	Dnajc2	1	1	0	1	0	1	1	5
mmu-miR-20a	Wasf1	1	1	1	1	0	0	1	5
mmu-miR-20a	AA409316	1	1	1	1	0	0	1	5
mmu-miR-20a	Tbxas1	1	1	1	1	0	0	1	5
mmu-miR-20a	Lace1	1	1	1	1	0	0	1	5
mmu-miR-20a	Ppp1r3b	1	1	1	1	0	0	1	5
mmu-miR-20a	Dctn4	1	1	1	1	0	0	1	5
mmu-miR-20a	Trpv6	1	1	1	1	0	0	1	5
mmu-miR-20a	Smoc1	1	1	1	1	0	0	1	5
mmu-miR-20a	Ttc9	1	1	1	1	0	0	1	5
mmu-miR-20a	Phf1	1	1	0	1	0	1	1	5
mmu-miR-20a	Tmem64	1	1	0	1	1	0	1	5
mmu-miR-20a	Bcl6	1	1	0	1	0	1	1	5
mmu-miR-20a	Nat12	1	1	1	1	0	0	1	5
mmu-miR-20a	Asf1a	1	1	0	1	0	1	1	5
mmu-miR-20a	Gda	1	1	1	1	0	0	1	5
mmu-miR-20a	Mapk14	1	1	1	1	0	0	1	5
mmu-miR-21	Mtmr12	1	1	1	1	0	0	1	5
mmu-miR-21	Srl	1	1	1	1	0	0	1	5
mmu-miR-21	Glis2	1	1	1	1	0	0	1	5
mmu-miR-21	Ankrd49	1	1	1	1	0	0	1	5
mmu-miR-21	Ppp1r3a	1	1	1	1	0	0	1	5
mmu-miR-21	Adk	1	1	0	1	0	1	1	5
mmu-miR-21	Appl1	1	1	1	1	0	0	1	5
mmu-miR-21	Dnm1l	1	1	1	1	0	0	1	5
mmu-miR-21	Pb1	1	1	1	1	0	0	1	5
mmu-miR-21	Pcdh12	1	1	1	1	0	0	1	5
mmu-miR-21	Tssk2	1	1	0	1	0	1	1	5
mmu-miR-21	Wisp1	1	1	1	1	0	0	1	5
mmu-miR-21	Xk	1	1	1	1	0	0	1	5
mmu-miR-21	Spry1	1	1	1	1	0	0	1	5
mmu-miR-21	Arid4a	1	1	1	1	0	0	1	5
mmu-miR-21	Postn	1	1	0	1	0	1	1	5
mmu-miR-21	Chd7	1	1	1	1	0	0	1	5
mmu-miR-21	Rreb1	1	1	1	1	0	0	1	5
mmu-miR-21	Tnks	1	1	1	1	0	0	1	5
mmu-miR-21	Dmrtc2	1	1	1	1	0	0	1	5
mmu-miR-21	Sc5d	1	1	1	1	0	0	1	5
mmu-miR-21	Hspa14	1	1	1	1	0	0	1	5
mmu-miR-21	Dnaja1	1	1	1	1	0	0	1	5
mmu-miR-21	Il33	1	1	1	1	0	0	1	5
mmu-miR-21	Slc14a2	1	1	0	1	0	1	1	5
mmu-miR-21	Tshz1	1	1	0	1	0	1	1	5
mmu-miR-21	Rtkn2	1	1	1	1	0	0	1	5
mmu-miR-21	Zfp367	1	1	1	1	0	0	1	5
mmu-miR-21	Acat1	1	1	1	1	0	0	1	5
mmu-miR-21	Cep68	1	1	1	1	0	0	1	5
mmu-miR-21	Ube2q2	1	1	0	1	0	1	1	5
mmu-miR-21	Pcbp1	1	1	1	1	0	0	1	5
mmu-miR-21	Galnt12	1	1	1	1	0	0	1	5
mmu-miR-21	Pnpt1	1	1	1	1	0	0	1	5
mmu-miR-21	Mrpl9	1	1	1	1	0	0	1	5
mmu-miR-21	Ccl20	1	1	1	1	0	0	1	5
mmu-miR-21	Pfkm	1	1	1	1	0	0	1	5
mmu-miR-21	Tipin	1	1	1	1	0	0	1	5
mmu-miR-21	Rab11a	1	1	1	1	0	1	0	5
mmu-miR-21	Clic5	1	1	1	1	0	0	1	5
mmu-miR-21	Per2	1	1	1	1	0	0	1	5
mmu-miR-21	Sgtb	1	1	1	1	0	0	1	5
mmu-miR-21	Ccl22	1	1	1	1	0	0	1	5
mmu-miR-21	Grsf1	1	1	1	1	0	0	1	5
mmu-miR-21	Map3k1	1	1	1	1	0	0	1	5
mmu-miR-21	Armcx1	1	1	1	1	0	0	1	5
mmu-miR-21	Epyc	1	1	1	1	0	0	1	5
mmu-miR-21	Ralgps1	1	1	0	1	0	1	1	5
mmu-miR-21	1700129I04Rik	1	1	1	1	0	0	1	5
mmu-miR-21	Alx1	1	1	1	1	0	0	1	5
mmu-miR-21	Wdr78	1	1	1	1	0	0	1	5
mmu-miR-21	Mprip	1	0	0	1	1	1	1	5
mmu-miR-21	Fa2h	1	1	1	1	0	0	1	5
mmu-miR-21	Dlg2	1	1	1	1	0	0	1	5
mmu-miR-21	Ank2	1	1	1	1	0	0	1	5
mmu-miR-21	Ammecr1	1	1	1	1	0	0	1	5
mmu-miR-21	Socs5	1	1	1	1	0	0	1	5
mmu-miR-21	Fbxo11	1	1	1	1	0	0	1	5
mmu-miR-21	Fmo2	1	1	1	1	0	0	1	5
mmu-miR-21	Klhdc5	1	1	1	1	0	0	1	5
mmu-miR-21	Bcl7a	1	1	1	1	0	0	1	5
mmu-miR-21	Hnrpa3	1	1	1	1	0	0	1	5
mmu-miR-21	Cxcr6	1	1	1	1	0	0	1	5
mmu-miR-21	Plekha1	1	1	1	1	0	0	1	5
mmu-miR-21	Pnrc2	1	1	1	1	0	0	1	5
mmu-miR-21	Pan3	1	1	1	1	0	0	1	5
mmu-miR-21	Eif2ak4	0	1	1	1	0	1	1	5
mmu-miR-21	Ganc	1	1	1	1	0	0	1	5
mmu-miR-21	Ski	1	1	1	1	0	0	1	5
mmu-miR-21	Stat3	1	1	1	1	0	0	1	5
mmu-miR-21	Tmem106a	1	1	1	1	0	0	1	5
mmu-miR-293	Nrf1	1	1	0	1	0	1	1	5
mmu-miR-293	Dusp1	1	1	0	1	0	1	1	5
mmu-miR-293	Jdp2	1	1	0	1	0	1	1	5
mmu-miR-293	Nfkbil1	1	1	0	1	0	1	1	5
mmu-miR-293	Ssbp2	1	1	1	1	0	0	1	5
mmu-miR-293	Sh3pxd2a	1	1	0	1	0	1	1	5
mmu-miR-293	Ptbp2	1	1	1	1	0	0	1	5
mmu-miR-293	Kctd10	1	1	1	1	0	0	1	5
mmu-miR-293	Lrp1	1	1	0	1	0	1	1	5
mmu-miR-295	Adam17	1	1	1	1	0	0	1	5
mmu-miR-295	Tcfap4	1	1	1	1	0	0	1	5
mmu-miR-295	Ubn1	1	1	1	1	0	0	1	5
mmu-miR-295	Pdk4	1	1	1	1	0	0	1	5
mmu-miR-295	Ect2	1	0	1	1	0	1	1	5
mmu-miR-295	Btn1a1	1	1	1	1	0	0	1	5
mmu-miR-295	Lep	1	1	1	1	0	0	1	5
mmu-miR-295	Ehd2	1	1	1	1	0	0	1	5
mmu-miR-295	Plk4	1	1	1	1	0	0	1	5
mmu-miR-295	Whsc1l1	1	1	0	1	0	1	1	5
mmu-miR-295	Trim36	1	1	0	1	0	1	1	5
mmu-miR-295	Tox	1	1	1	1	0	0	1	5
mmu-miR-295	Nol7	1	1	1	1	1	0	0	5
mmu-miR-295	Necab1	1	1	1	1	0	0	1	5
mmu-miR-295	Tiparp	1	1	0	1	0	1	1	5
mmu-miR-295	Sh3tc2	1	1	0	1	0	1	1	5
mmu-miR-295	Tmprss6	1	1	1	1	0	0	1	5
mmu-miR-295	Cdkn1a	1	1	1	1	0	0	1	5
mmu-miR-295	Rragd	1	1	1	1	0	0	1	5
mmu-miR-295	Lrat	1	1	1	1	0	0	1	5
mmu-miR-295	Hoxa1	1	1	0	1	0	1	1	5
mmu-miR-295	Mbd2	1	1	0	1	0	1	1	5
mmu-miR-295	Ica1l	1	1	1	1	0	0	1	5
mmu-miR-295	Zfp148	1	1	1	1	1	0	0	5
mmu-miR-295	Znrf3	1	1	1	1	0	0	1	5
mmu-miR-295	Zdhhc9	1	1	0	1	0	1	1	5
mmu-miR-295	Neurod6	1	1	1	1	0	0	1	5
mmu-miR-295	Elf4	1	1	1	1	0	0	1	5
mmu-miR-295	Phf6	1	1	0	1	1	0	1	5
mmu-miR-295	AC158970.3	1	1	1	1	0	0	1	5
mmu-miR-295	Tinf2	1	1	1	1	0	0	1	5
mmu-miR-295	Paf1	1	1	0	1	0	1	1	5
mmu-miR-295	Iqgap3	1	1	0	1	0	1	1	5
mmu-miR-295	Tmem129	1	1	1	1	0	0	1	5
mmu-miR-295	Slc16a12	1	1	1	1	0	0	1	5
mmu-miR-295	Reep3	1	1	1	1	0	0	1	5
mmu-miR-295	March5	1	1	1	1	0	1	0	5
mmu-miR-295	Cdgap	1	1	1	1	0	0	1	5
mmu-miR-295	1200015N20Rik	1	1	1	1	1	0	0	5
mmu-miR-295	Ldoc1	1	1	1	1	0	0	1	5
mmu-miR-295	Mtm1	1	1	1	1	0	0	1	5
mmu-miR-295	Wfs1	1	1	1	1	0	0	1	5
mmu-miR-295	Wdfy2	1	1	0	1	0	1	1	5
mmu-miR-295	Senp7	1	1	1	1	0	0	1	5
mmu-miR-295	Erlin1	1	1	1	1	0	0	1	5
mmu-miR-295	Adarb1	1	1	1	1	0	0	1	5
[truncated: 660 more rows]
